# Supplementary material for: Single-cell-level protein analysis revealing the roles of autoantigen-reactive B lymphocytes in autoimmune disease and the murine model
Source: eLife. 2021 Dec 2;10:e67209. doi: 10.7554/eLife.67209 (PMC8639144; doi:10.7554/eLife.67209)
Supplement: Figure 1—source data 1. — This archive contains all data used for the quantitative analysis shown in Figure 1. [file elife-67209-fig1-data1.xlsx]

## Sheet: Fig 1A
hTopo I-specific B cells (%)	HC	SSc-CENP	SSc-Topo I
	0.1	0.2	0.6
	0.2	0.03	1
	0.1	0.14	1.1
	0.05	0.12	1.2
	0.14	0.1	1.3
	0.17	0.13	0.5
	0.09	0.2	0.6
	0.21	0.02	1.1
	0.11	0.13	1.1
	0.06	0.11	1.2
	0.15	0.1	1.2
	0.16	0.1	0.6
	0.11	0.18	0.6
	0.2	0.04	1
	0.1	0.15	0.8
	0.06	0.13	1.2
	0.13	0.12	1.2
	0.18	0.14	0.6
	0.13	0.21	0.6
	0.19	0.04	1.1
	0.09	0.13	1.1
	0.06	0.11	1
	0.13	0.1	1.3
	0.16	0.1	0.7
	0.11	0.17	0.6
	0.21	0.02	1.1
	0.12	0.13	1.1
	0.06	0.12	1.3
	0.15	0.1	1.3
	0.17	0.12	0.6
	0.09	0.2	0.7
	0.19	0.03	1
	0.11	0.1	1.2
	0.05	0.12	1.4
	0.13	0.12	1.3
	0.15	0.12	0.6
	0.8	0.13	0.7
	0.21	0.05	1.2
	0.1	0.18	1.3
	0.04	0.12	1.2
	0.13	0.1	1.3
	0.18	0.11	0.6
	0.12	0.23	0.5
	0.18	0.05	1.1
	0.1	0.13	1.2
	0.06	0.11	1.3
	0.13	0.1	1.4
	0.16	0.12	0.6
	0.13	0.1	1.4
	0.15	0.12	0.6
			0.6
			1
			1.1
			1.1
			1
			0.8
			0.5
			1
			1.3
			1.3
			1.3
			0.5
			0.5
			1.1
			1.1
			1.2
			1.4
			0.6
			0.7
			1.3
			1.1
			1.2
			1.3
			0.6
			0.6
			1
			1.2
			1.2
			1.4
			0.6
			0.6
			1.1
			1.2
			1
			1.2
			0.6
			0.6
			1
			1.2
			1.2
			1.4
			0.6
			0.4
			1.2
			1.3
			1.3
			1.4
			0.6
			1.2
			0.6
			0.4
			0.6
			1.1
			1.1
			1.3
			1.4
			0.6
			1.2
			0.6
			1.1
			0.6

## Sheet: Fig 1B
	CTL	HC	SSc-CENP	SSc-Topo I
1	0.11	0.13	0.12	0.29
2	0.08	0.14	0.1	0.9
3	0.13	0.12	0.13	0.89
4	0.1	0.11	0.08	0.88
5	0.06	0.1	0.06	0.76
6	0.12	0.1	0.09	0.24
7	0.07	0.07	0.05	0.26
8	0.08	0.08	0.13	0.28
9	0.05	0.13	0.1	0.78
10	0.1	0.1	0.12	0.72

## Sheet: Fig 1C-1
TopoI	S	S	S	S	S	S	S	S	S	S	S	S	S	S	S	S	S	S	S	S	S	S	S	S	S	S	S	S	S	S	S	S	S	S	S	S	S	S	S	S	S	S	S	S	S	S	S	S	S
TGFB1	0	0	0	0	1240	0	0	0	0	0	0	0	0	0	0	0	0	0	0	0	0	0	0	0	0	0	0	0	0	150	0	0	0	0	0	0	0	0	0	0	0	0	0	0	0	0	525	0	0
IL6	0	0	0	0	0	216.2	0	136.82	0	647.39	0	0	0	1.27	0	0	0	342.54	0	4.25	0.6	0	0	0	0	10.35	1018.13	45.68	91.33	0	33.86	237.46	0	222.74	81.2	170.25	215.96	157.64	0	120.72	0	9.25	40.85	108.26	76.38	0	0	108.1	74.5
IL35	0	0	0	0	0	0	0	20.71	440.29	0	0	695.33	6.29	0	16.05	0	0	0	0	0	0	0	0	19.45	0	0	0	0	30.74	0	0	0	0	0	49.11	259.97	0	0	0	0	39.25	10.09	0	0	0	141.15	0	0	0
IL23	49.59	710.47	0	0	0	0	0	0	0	0	9.44	0	165.5	0	760.07	0	2.4	0	0	0	0	0	0	79.71	0	0	0	0	0	0	98.91	0	0	0	69.67	0	0	76.71	0	0	0	3.89	0	0	0	1.06	0	0	0
IL2	0	0	0	0.8	2291.64	0	0	0	0	0	49.88	0	17.13	0	0	86.68	0	3.01	0	0	240.2	0	0	0	0	0.45	0	0	1574.82	0	0	4634.53	4.05	0	0.79	218.61	0	0	808.48	0	0	0	0	0	0	0	0	0	0
IL16	0	0	0	0	0	57.49	0	0	0	0	3.01	0	0	13.39	0	0	0	0	0	0	718.28	0	138.49	0	130.29	0	0	0	666.96	0	0	0	133	0	1.1	0	0	0	0	0	0	12.55	0	0	6.14	0	49.74	0	5.12
IL14	0	0	0	0	57.38	0	0	0	0	0.11	0.82	0	42.12	0	2.09	0	0	0	0	0	0	0	0	0.25	0	0.17	0	0	0	0.43	20.19	0	0	0	6.79	0	0	2.21	0	0	0	8.14	0	31	0	72.51	0	30	0
IL10	0	232.23	0	0	217.83	0	48.85	0	0	0	0	34	0	0	0	0	72	0	41	0	25	4300.54	35	0	0	0	0	10.3	0	0	0	0	0	0	0	0	0	35	82	0	0	24.6	0	0	0	0	0	0	0
Control	100	100	100	100	100	100	100	100	100	100	100	100	100	100	100	100	100	100	100	100	100	100	100	100	100	100	100	100	100	100	100	100	100	100	100	100	100	100	100	100	100	100	100	100	100	100	100	100	100
[truncated: 51 more columns]

## Sheet: Fig1C-2
TopoI	N	N	N	N	N	N	N	N	N	N	N	N	N	N	N	N	N	N	N	N	N	N	N	N	N	N	N	N	N	N	N	N	N	N	N	N	N	N	N	N	N	N	N	N	N	N	N	N	N
TGFB1	0	0	0	0	0	0	0	0	0	0	0	0	0	0	0	0	0	0	0	0	0	0	0	0	0	0	0	0	0	0	0	0	0	0	0	0	0	0	0	0	0	0	0	0	0	0	0	0	0
IL6	0	0	0	0	0	0	0	0	0	0	0	0	0	0	0	0	0	0	0	0.189	0.056	0	0.291	0	3.883	0	0	0.077	0	0	0	0.649	0	0	0	0	0	0	0	0	0	0	0	0	0	0	0	0	0
IL35	0	0	0	0	0	0.04	0.584	0	0.906	0	0	0	0	0	0	0	0	0	0	1.022	0	0.253	0	0	0.979	0	0	0	0	1.469	0	0.122	0	0	0	0	0	0	0	1.54	0	3.721	0	0	0	0	3.12	0	0
IL23	0	0	0	0	0	0	0	0	0	0	0	0	0	0	0	0	0	0	0	0.294	0	0	0	0	0.458	0	0	0	0	0	0	0	0	0	0	0	0.08	0	0	2.762	0	0	0	0	0	0	0	0	0
IL2	0	0	0	0	0	0	0.208	0	0	0	0	0	0	0	0	0	0	0	0	1.461	0.079	0	0	0	0	0	1.517	0.038	0	0	0.805	3.008	0.095	0	0	0.099	0	0	0	0	0	0	0	0	0	0	0	0	0
IL16	0	0	0	0	0	0	0	0	0	0.203	0	0.1	0	0	0	0	0	0.04	0	0.451	0	0	0	0	0	0	0	0	0	0	0	0.341	0	0	0	0	0	0	0	0	0	0	0	0	0	0	0	0	0
IL14	0	1.83	0	0	0.123	0	0	0.008	0.01	1.12	0.801	2.34	0	0	0	0.029	0	0	0	0.243	0	0.019	0	0	0.245	0.034	0	0	0	0	0	2.539	0	0.009	0	0	0	0	0	1.159	0.019	0	0.734	0	0	0.035	0	0.456	0
IL10	0	0	0	0	0	0	0	0	0.031	0	0	0	0	0	0	0	0	0	0	0.063	0.048	0.061	0	0	0	0	1.65	0	0	0	0	0.034	0	0	0	0	0	0	0	0	0	0	0	0	0.042	0	0	0	0
Control	100	100	100	100	100	100	100	100	100	100	100	100	100	100	100	100	100	100	100	100	100	100	100	100	100	100	100	100	100	100	100	100	100	100	100	100	100	100	100	100	100	100	100	100	100	100	100	100	100
[truncated: 51 more columns]

## Sheet: Fig 1D-1
TopoI	S	S	S	S	S	S	S	S	S	S	S	S	S	S	S	S	S	S	S	S	S	S	S	S	S	S	S	S	S	S	S	S	S	S	S	S	S	S	S	S	S	S	S	S	S	S	S	S	S
TGFB1	0	0	0	200	1240	200	0	0	0	0	0	0	0	0	0	0	0	0	0	0	0	0	0	0	0	0	0	0	0	150	0	0	200	0	0	0	0	0	0	0	0	0	0	0	0	0	525	0	0
IL6	0	0	0	222	0	223	0	133	0	640	0	0	0	2	0	0	0	354	0	5	3	0	0	0	0	20	1032	46	90	90	36	240	0	224	80	180	221	165	0	122	0	10	42	110	80	0	0	121	89
IL35	0	0	35	0	0	0	33	21	442	0	0	700	8.4	0	15.5	0	0	0	0	0	0	0	0	22	0	0	0	24	32	0	0	0	0	0	50	265	0	0	0	0	44	13	0	0	0	149	0	0	0
IL23	66	754	0	0	0	0	0	0	0	0	13	0	176	0	843	0	4	0	0	0	0	0	0	89	0	0	0	0	0	0	121	0	0	0	89	66	0	66	0	0	0	56	0	0	0	3	0	0	0
IL2	0	0	0	4	2433	0	0	0	0	54	60	0	34	0	0	90	0	4	0	0	244	0	0	0	0	5	0	0	1654	0	0	4223	6	0	4	224	0	0	954	0	0	0	0	0	0	0	0	0	0
IL16	0	0	0	0	0	65	0	0	0	0	5	0	0	15	0	0	0	0	0	0	667	0	144	0	132	0	0	0	700	0	0	0	332	0	2	0	0	0	0	0	0	14	0	0	7	0	52	0	5
IL14	0	0	0	66	61	0	0	0	0	2	3	0	43	0	3	0	0	0	3	0	0	0	0	3	0	3	0	0	0	2	24	0	0	0	8	0	0	4	0	0	0	9	0	34	0	87	0	34	0
IL10	0	230	0	0	223	0	45	0	0	0	0	33	0	0	0	0	70	0	43	0	32	4355	33	0	0	0	0	10	0	0	0	0	0	0	0	0	0	32	80	0	0	25	0	0	0	0	0	0	0
Control	100	100	100	100	100	100	100	100	100	100	100	100	100	100	100	100	100	100	100	100	100	100	100	100	100	100	100	100	100	100	100	100	100	100	100	100	100	100	100	100	100	100	100	100	100	100	100	100	100
[truncated: 51 more columns]

## Sheet: Fig 1D-2
TopoI	S	S	S	S	S	S	S	S	S	S	S	S	S	S	S	S	S	S	S	S	S	S	S	S	S	S	S	S	S	S	S	S	S	S	S	S	S	S	S	S	S	S	S	S	S	S	S	S	S
TGFB1	10	0	0	0	122	12	0	11	0	0	0	0	10	0	0	0	0	0	0	0	0	0	53	0	0	0	0	0	0	155	0	0	0	0	0	0	10	0	0	0	0	0	0	0	0	0	500	0	0
IL6	0	0	0	0	0	223	0	144	0	655	0	0	0	3	0	0	0	332	0	5	3	15	0	0	0	11	988	53	94	0	35	244	0	243	89	180	223	165	0	132	0	12	45	121	80	0	0	112	79
IL35	0	0	32	0	0	0	0	22	443	0	42	784	13	0	22	0	0	0	0	0	21	0	0	22	0	0	0	0	35	0	0	0	0	0	53	286	0	0	0	0	43	14	0	0	0	154	0	0	0
IL23	42	554	0	0	0	0	0	0	0	0	19	0	332	0	885	0	4	0	0	0	0	0	0	88	0	0	0	0	0	0	132	0	0	0	80	0	0	88	0	0	0	7	0	0	0	4	0	0	0
IL2	13	0	0	10	2254	0	0	0	0	4	55	0	24	0	0	99	0	5	0	0	244	0	0	0	0	4	0	0	1554	0	0	4345	10	0	11	244	0	0	992	0	0	0	0	0	0	0	102	0	0
IL16	0	0	0	0	0	65	0	0	0	0	6	0	0	19	0	0	0	0	0	0	786	0	154	0	185	0	0	0	765	0	0	0	154	0	4	0	0	0	0	0	0	19	0	0	8	0	55	0	7
IL14	0	0	0	0	66	0	0	0	0	5	3	0	46	0	5	0	0	0	0	0	0	0	0	2	0	1	0	0	0	2	1	0	2	0	8	0	4	3	0	0	0	10	0	35	0	87	0	43	0
IL10	0	230	0	0	221	0	40	0	0	0	0	44	0	0	0	0	80	0	46	0	30	4332	32	0	0	0	0	13	0	0	0	0	0	0	0	0	0	45	95	0	0	29	0	0	0	0	0	0	0
Control	100	100	100	100	100	100	100	100	100	100	100	100	100	100	100	100	100	100	100	100	100	100	100	100	100	100	100	100	100	100	100	100	100	100	100	100	100	100	100	100	100	100	100	100	100	100	100	100	100
[truncated: 51 more columns]
