# Supplementary material for: Single-cell-level protein analysis revealing the roles of autoantigen-reactive B lymphocytes in autoimmune disease and the murine model
Source: eLife. 2021 Dec 2;10:e67209. doi: 10.7554/eLife.67209 (PMC8639144; doi:10.7554/eLife.67209)
Supplement: Figure 2—figure supplement 1—source data 1. — This archive contains all data used for the quantitative analysis shown in Figure 2—figure supplement 1. [file elife-67209-fig2-figsupp1-data1.xlsx]

## Sheet: Fig 2S1A
log10 concentration, M	High	Low
-10	0	0
-9	18	3
-8	44	5
-7	75	8
-6	90	48
-5	99	90
-4	100	99

## Sheet: Fig 2S1B
-log10 Kd	anti-TopoI IgG/total IgG
5.9	26.8
5.5	27.5
6.2	31
5.8	27.7
5.2	27.9
5.5	28
5.9	29
6.3	30
5	22.4
4.6	21
7.8	70
8.1	82.3
7.5	72.2
7.7	67.3
7.6	75.5
7.4	76.3
7.2	70.4
7	65
8	85.4
8.4	95.2
