# Supplementary material for: Single-cell-level protein analysis revealing the roles of autoantigen-reactive B lymphocytes in autoimmune disease and the murine model
Source: eLife. 2021 Dec 2;10:e67209. doi: 10.7554/eLife.67209 (PMC8639144; doi:10.7554/eLife.67209)
Supplement: Figure 2—figure supplement 2—source data 1. — This archive contains all data used for the quantitative analysis shown in Figure 2—figure supplement 2. [file elife-67209-fig2-figsupp2-data1.xlsx]

## Sheet: Fig 2S2
Topo I-r	Topo I-nr
93.3	4.92
96.6	7.84
90.3	1.52
89.9	4.42
96.8	3.22
100	2.59
99.3	5.59
92.3	4.32
94.1	6.67
93.9	7.7
