# Supplementary material for: Single-cell-level protein analysis revealing the roles of autoantigen-reactive B lymphocytes in autoimmune disease and the murine model
Source: eLife. 2021 Dec 2;10:e67209. doi: 10.7554/eLife.67209 (PMC8639144; doi:10.7554/eLife.67209)
Supplement: Figure 2—figure supplement 3—source data 1. — This archive contains all data used for the quantitative analysis shown in Figure 2—figure supplement 3. [file elife-67209-fig2-figsupp3-data1.xlsx]

## Sheet: Fig 2S3 CD80
Non	Low	High
1	2	2
0.9	2.1	1.5
0.95	1.8	1.6
1	1.7	1.7
0.96	1.9	1.8
0.99	2	1.9
1.02	2.1	2.1
1	1.7	2.1
1.02	1.6	2.2
1	1.5	1.8

## Sheet: Fig 2S3 CD86
Non	Low	High
1.05	1.99	2
0.85	2.1	1.67
0.95	1.85	1.6
1	1.7	1.7
0.95	1.9	1.79
1	1.97	1.9
1.01	2.1	2.1
1	1.7	2.05
1.02	1.68	2.2
1	1.5	1.8

## Sheet: Fig 2S3 ICOSL
Non	Low	High
1.05	2.1	2.1
0.95	2.1	1.7
0.98	1.9	1.6
1	1.7	1.8
0.96	1.9	1.8
1	2	1.9
1	2.1	2.1
1	1.7	2.1
1.1	1.8	2.2
1	1.5	1.8

## Sheet: Fig 2S3 CD40
Non	Low	High
1.1	2.2	2.2
0.9	2.1	1.8
0.8	1.9	1.7
1	1.8	1.8
0.9	1.9	1.8
1	2	1.9
0.8	2.1	2.2
1.2	1.8	2.1
1.1	1.8	2.2
1	1.6	1.7
