# Supplementary material for: Single-cell-level protein analysis revealing the roles of autoantigen-reactive B lymphocytes in autoimmune disease and the murine model
Source: eLife. 2021 Dec 2;10:e67209. doi: 10.7554/eLife.67209 (PMC8639144; doi:10.7554/eLife.67209)
Supplement: Figure 2—source data 1. — This archive contains all data used for the quantitative analysis shown in Figure 2. [file elife-67209-fig2-data1.xlsx]

## Sheet: Fig 2A
Topo I-non-reactive	Topo I-reactive
1.2	22
1.3	23.1
3.3	26.3
3.2	25.6
2.5	24.5
3	25.3
2.4	25.2
2	25.1
1	25.6
1	25.5
1.1	25.5
1.5	24.5
1.8	25.6
2.1	27.6
2.5	26.8
2.6	25.8
2.8	25.1
3.1	25.9
3.2	26
4.2	26.1
3.7	26.2
3.8	26.3
3.9	26.3
4.2	26.4
4.1	26.3
4.5	26.4
4.4	26.3
4.7	26.1
2.5	26.5
2.6	26.7
2.2	26.6
2.8	26.8
2.9	26.9
3	24.3
3.1	27.2
3.2	26.8
3.6	26.9
2.2	26.5
2.3	25.4
2.3	25.3
3	25.1
1	25.6
2.2	25.8
0.2	25.1
2.4	25.5
2.3	25.3
2.5	24.5
2.2	24.4
2	24.7
2	24.8
2	22.2
3.2	22.1
2	22
2	24.9
2	24
2	24.6
2	24.7
1.2	24
1.2	23
1.1	25
1.1	26
2	27
5.3	24.5
1	25.6
3	26.8
2	27.5
4	27.6
5.4	27.7
1.1	27.9
1	28
3.2	29
1.2	30
1	22.4
1.9	22.5
3.1	22.7
3.4	30
3.3	29
3.6	28
3.7	27
3.8	25
4.1	75
4.2	75.5
1	75.5
4	68.4
4	68.7
3.4	69.2
3.6	69
3.3	69.2
1.2	69.6
1.3	75.4
1.5	75.4
1.4	75.5
1	75.5
1.6	83
1.7	82
1	74
4.4	77
4.5	72
3	68
3.1	66
3.2	75.3
3	75.6
3.4	76
3.5	75.6
3.2	75.8
3.1	65
2.4	76.2
3	76.1
4.5	76.6
3.6	64
1.1	76.6
1.5	68
1.8	76.6
2.1	67
2.5	75.8
2.6	76
2.8	75.8
3.1	75.9
3.2	75.9
4.2	76
3.7	76.2
3.8	60
3.9	76.2
4.2	76.1
4.1	77
4.5	70
4.4	76.3
4.7	76.2
3.4	76.2
3.5	76.1
3.2	76.3
3.3	76.3
3.3	76.3
3	85.4
3	95.2
3	68
3	81.2
3.2	81.3
3.2	83.2
3.1	74.4
3.1	74.2
3	74
3	74.2
3	74.1
3.5	73.2
3.4	73.7
4.2	73.8
4	73.3
4	72.8
4	72.6
4	72.3
4	72.2
4.1	72.1
4.2	71.8
3.5	71.5
4.5	71.1
4.5	71
4.5	70
1.1	70.5
4	70.6
1	70.2
5	70.9
5	68
5	75.5
5.2	75.8
5.2	75.4
5.1	75.2
0.1	75
0.3	75.9
0.4	76
0.6	76.1
0.2	76
0.7	76.2
0.8	76.3
3.1	76.2
3.4	76.2
3.3	76.9
3.6	77.1
3.7	69
3.8	68
4.1	79
4.2	79.3
0.1	80.1
0.1	80.4
0.2	80.9
3	66
0.4	73
0.3	85
0.5	86
0.5	87
0.2	88
0.3	66
3.4	65
3	68
4	75
2	88.2
1	89.1
4.5	82
3.1	85
3.1	94

## Sheet: Fig 2C
IL-10	low	high		IL-6	low	high		IL-23	low	high		IL-35	low	high		IL-2(%)	low	high		TGFB1(%)	low	high
fg/mL	4.2	2.3		fg/mL	10.1	11		fg/mL	3.6	11		fg/mL	1.25	1.02			4	5			1	2.2
	4	2.2			6.5	25			4.2	13			1.35	1.1			3.4	4			2	1.1
	3.5	2			7.5	35			3.6	14			1.42	1.03			4.2	4.2			2	1.4
	2.7	2.9			5.5	24			4.7	15			1.4	1.08			5.4	4.6			2.2	2.1
	3.8	3			7.6	18			2.7	14.2			1.55	1.23			3.7	3.3			1.3	2.9
	2.9	2			9.3	13.2			3.9	15.6			1.63	1.2			3	6.4			2.5	1.3
	3	1.8			5.3	14.3			4.5	10			1.1	0.84			4.1	5.1			1.6	2.1
	3.2	2.1			5	19.9			5.6	10.9			1.32	0.9			4.4	4.8			1.8	1
	3.1	2			7.6	14.5			5.9	8.9			1.55	1			4.6	4.4			0.9	0.3
	4.5	1.9			9.8	31			6.2	9			1.64	0.66			5	3.5			0.6	0.7

## Sheet: Fig 2D
affinity	IL10	CSK	MKNK2	BEX1	ASCC1	TNIP2	p38	p-p38	ATF1	IL-35	EOLA1	HPK1	FOS	IL6	THEMIS2	HCST	BRAF	C12orf66	NFKB2	IL23A	RAF1	CRTC3	JKAMP	JAK1	p-JAK1	JAK2	p-JAK2	JAK3	p-JAK3	TYK2	p-TYK2	STAT1	p-STAT1	STAT2	p-STAT2	STAT3	p-STAT3	STAT4	p-STAT4	STAT5A	p-STAT5A	STAT5B	p-STAT5B	STAT6	p-STAT6	BTK	p-BTK	LYN	p-LYN
100	0	0	0	0	0	0	0	0	0	0	0	0	1793.75	0	0	0	0	0	0	49.59	0	0	4.01	0	0	0	0	0	0	0	0	0	0	0.83	2.32	0.39	2.11	0	0	0	0	0	0	731.35	1554.89	0	0	0	0
110	232.23	0	0	0	0	43.32	0	0	0	0	0	1.1	0.31	0	0	0	0	0	7.03	710.47	0	0	1.55	167.57	442.23	0	0	0.47	2.21	0	0	0	0	0	0	458.83	1003.42	0	0	0	0	0.13	0.33	0	0	0	0	0	0
98	0	0	0	0	0	29.31	0	0	0	0	0	5.81	72.11	216.2	0	0	5.48	0	27.93	0	0	0	1.86	0	0	0.09	0.22	0	0	0	0	0	0	0	0	28.94	64.54	0	0	0	0	4.14	12.43	13.19	32.67	0	0	0	0
22	48.85	0	0	0	0	1.55	0	0	0	0	0	0	0	0	0	0	208.29	0	0	0	0	0	0	0	0	0	0	0	0	0	0	0	0	0	0	0	0	0	0	335.12	898.43	1.47	3.44	10.52	22.31	0	0	0	0
25	217.83	0	26.63	0	0	27.86	0	0	0	0	0	0	195.87	0	216.51	0	37.97	0	1.76	0	69.59	0	0	18.59	53.43	0	0	0	0	0	0	0	0	0.46	1.23	0	0	0	0	0	0	0	0	25.92	76.44	0	0	0	0
98	0	0	0.58	3.25	0	1.35	0	0	21.98	20.71	0	0	38.8	136.82	0	0	77.69	0	0	0	2.33	31.73	0	5.82	13.2	0	0	0	0	2.32	5.44	0	0	0	0	29.44	74.54	70.37	203.4	16.87	33.45	128.49	329.44	0	0	0	0	55.23	143.2
22	0	0	0	0	0	99.55	0	0	0	5.84	0	7.88	0	0	0	0	0	0	0	0	0	0	0	0	0	0	0	0	0	0	0	0	0	0	0	466.54	1021.23	0	0	0	0	0	0	0	0	0	0	0	0
24	0	0	0	0	0	0	0	0	0	440.29	0	0	0	0	0	0	13.2	0	24.23	0	61.82	0	1.02	0.08	0.34	0	0	0	0	0	0	0	0	0	0	0	0	0	0	0	0	0	0	0	0	0	0	0	0
24	0	0	0	0	0	0	0	0	0	0.4	0	0	111.01	0	0	0	0	0	0.15	0	0	0	0	0	0	0	0	0	0	0	0	0	0	0	0	130.86	343.32	0	0	0	0	0.08	0.22	0	0	0	0	0	0
130	0	0	7.13	0	2.1	0	0	0	0	0	0	0	0	647.39	0	0	0	0	0	0	95.65	0	0	345.66	756.4	0	0	0	0	0	0	0	0	0	0	0	0	0	0	0	0	0	0	0	0	0	0	0	0
21	0.31	0	0	0	0	3.15	0	0	0	9.06	0	0	0	0	0	0	0	0	0.17	0	0.22	0	0	2.16	5.53	0	0	0	0	0	0	0	0	0	0	0	0	0	0	2.2	5.59	0.1	0.43	0	0	0	0	0	0
21	0.34	0	0	431.7	0	24.06	0	0	0	695.33	135.21	491.75	8040.65	0	0	0	0	0	0	0	0	0	0	0	0	0	0	0.37	1.21	0	0	0	0	0	0	0	0	0	0	0	0	0	0	0	0	0	0	0	0
67	0	0	14.91	277.66	0	5.14	0	0	150.13	6.29	1.23	199.25	57.27	0	0	0	0	0	0	165.5	6.74	0	0	196.73	465.4	0	0	0	0	0	0	0	0	0.13	0.33	69.54	202.31	0	0	0	0	0	0	0.95	3.21	0	0	0	0
89	0	0	141.21	0	0	76.96	0	0	11.97	0	0	0	0	0	119.76	0	0	0	0.27	9.44	43.99	2	0	47.13	100.23	0	0	0	0	0	0	0	0	0	0	6.43	14.32	0	0	115.51	342.7	163.83	343.55	4.98	13.29	0	0	0	0
88	0	366.33	0	1.41	1.75	1.26	0	0	113.32	0	0	0	0	1.27	0	0	0	0	0	0	3.99	0	1.52	0.31	2.33	0	0	0	0	0	0	0	0	0	0	128.59	302.45	0	0	52.87	132.5	0	0	5.29	13.43	0	0	48.68	103.44
100	0	0.21	27.77	0	0	0	0	0	0	0	0	0	0	342.54	0	0	0	0	0	0	0	0	0	0	0	0	0	0	0	0	0	0	0	0	0	0	0	0	0	0	0	0	0	0.12	0.33	0	0	0.08	0.32
50	0.63	2.04	4.85	1.67	1.21	48.31	0	0	6.19	10.22	3.13	2.31	10.98	1.89	0.47	0.93	3.46	0.13	7.22	2.94	4.44	1.72	3.72	3.19	10.21	0.93	2.32	0.1	0.33	13.91	34.32	0	0	4.33	10.22	6.25	15.43	0.91	3.44	11.71	33.49	5.68	13.23	39.23	89.77	0	0	8.17	17.83
120	0	25.76	0	0	0	0	0	0	0	16.05	4.9	0	0	0	0	0	0	0	0	760.07	342.68	191.42	411.17	97.4	324.2	0	0	0	0	0	0	0	0	0	0	0	0	0	0	74.52	214.33	4.25	9.88	0	0	0	0	0	0
44	0.72	0	0	0	0	0	0	0	0	0	0	0	2895.3	0	0	0	0	0	0	2.4	0	0	0	0	0	0	0	0	0	0	0	0	0	0	0	0	0	0	0	0	0	0.34	1.23	0	0	0	0	0	0
24	430.54	422.35	371.89	1067.62	935.81	505.76	1564.88	3324.1	552.03	0	0	0	0	0	0	0	0	0	0	0	0	0	0	385.48	895.5	0	0	0	0	0	0	0	0	0	0	580.49	1432.34	0	0	0	0	49.8	132.22	0.33	1.02	0	0	0	0
22	0.35	81.26	70.53	1.34	0.2	0	0	0	0	0	0	301.06	374.44	0	39.76	35.3	0.05	18.97	29.98	0	79.05	0.23	0	43.74	102.3	17.5	44.3	0	0	60.38	132.4	25.4	53.43	32.89	89.88	0.33	1.32	16.13	39.44	0	0	47.11	143.33	30.91	87.39	196.17	243.22	46.7	78.93
24	0.41	0	0	0	0	0	0	0	0	0	0	0	0	0	0	0	0	0	0	0	0	0	0	0	0	0	0	0	0	0	0	0	0	0	0	12.42	36.54	0	0	0	0	5.29	13.22	1.19	3.31	0	0	0.11	0.33
43	0.48	0	0	0	9.55	0	0	0	0	0	0	0	0	0.56	0	0	249.53	0.09	0	0	0.53	0	0	200.4	534.2	0	0	0	0	0	0	0	0	0	0	2.96	9.45	0	0	734.29	1556.72	0.22	0.59	0	0	0	0	0	0
78	0	0	0	0	0	0.5	0	0	0	0	0	2.64	0	4.25	0	0	0	0.1	0	0	0	1.13	0	0	0	0	0	0	0	0	0	0	0	0	0	0.28	1.22	0	0	0	0	0.59	1.33	0	0	0	0	0	0
21	0.61	0	0	0	0	0	0	0	0	2.53	9.08	0.18	0	0	0	0	0.05	0	7.3	0	78.02	0	0	17.06	43.4	0.09	0.22	0	0	0	0	0	0	0.14	0.42	0	0	0	0	39.68	89.34	0.28	0.57	0	0	0	0	0.21	1.02
92	0	0	0	0	0.24	0	0.48	1.23	0.16	0	0	0	0	2.91	0	0	0	0	62.2	0	0	0	0	0	0	0	0	0	0	0	0	0	0	3.47	11.21	0	0	0	0	0	0	0	0	0	0	0	0	0	0
38	0.25	294.09	0	0	0	1.99	0	0	0	0	0	0.09	0	0.6	0	0	0	0	2.64	0	0.81	0	0	0.08	0.24	0	0	0	0	0	0	0	0	0	0	0.66	1.53	0	0	0	0	0	0	154.77	305.81	0	0	332.68	983.06
70	0	17.81	6.23	0	0	24.04	0	0	96.02	19.45	47.93	0	314.84	0	0	0	38.6	0	5.02	79.71	21.91	1.54	0	29.7	66.56	0	0	0	0	0	0	0	0	0	0	24.05	78.43	0	0	40.56	94.44	16.71	43.52	18.63	40.22	1.39	3.89	34.59	97.45
160	0	0	0	0	0	2.88	0	0	0	0	0	0	0	1018.13	376.85	292.12	610.36	137.68	196.9	0	0	55.18	0	0	0	0	0	0	0	0	0	65.74	203.44	0	0	1.3	3.33	0	0	0	0	0	0	218.98	505.55	0	0	0.13	0.33
89	1.03	0	0	0	0	0	0	0	0	0	0	0	182.21	45.68	0	0	0	0	0	0	0	0	0.48	0	0	0.07	0.24	0	0	113.88	333.2	0	0	0	0	0.08	0.32	0	0	128.64	289.55	0.28	1.02	0	0	0	0	0.35	1.02
97	0	0	0	6.4	0	0	0	0	0	0	0	0	0	10.35	0	0	0	0	0.28	0	0	0	0	55.73	132.3	0	0	0.3	1.22	0	0	0	0	0.13	0.33	0.22	1.22	0	0	0.14	0.43	0	0	25.77	52.33	0	0	110.24	329.04
80	0	0	0	0	0.33	472.25	0	0	0	0	0	0	0	0.77	0	0	0	0	0	0	0	0	0	0	0	0.07	0.21	0	0	0	0	0	0	0	0	0	0	0	0	234.26	534.78	0	0	0	0	0	0	0.06	0.33
52	0	0	0	2.43	0	106.46	19.59	44.32	0.57	97.09	0	0	61.47	38.83	0	0	5.37	0	9.79	4.58	0	0	0	0	0	37.61	100.32	0	0	0	0	1.8	5.53	0	0	56.54	143.21	0	0	121.83	302.45	24.2	67.89	136.17	323.8	0	0	0	0
78	0	0	0	0	0	5.64	0	0	0	30.74	0	0	0	91.33	0	0	0	0	15.99	0	0	0	22.87	388.06	956.44	0	0	0	0	1.35	3.44	0	0	0	0	0	0	0	0	0.35	1.22	1.85	4.44	0	0	0	0	0.22	0.77
22	165.41	0	0	0	0	0	0	0	0	0	0	0	0	0	0	0	0	0	0	0	38.21	0	0.41	3.78	10.23	0	0	0.11	0.34	0	0	0	0	0	0	0	0	0	0	746.9	1876.58	19.19	49.34	315.94	784.44	0	0	0	0
98	0	0	0	5.55	0	26.49	0	0	0	0	0	0	0	33.86	0	18.74	0	0	0	98.91	0	0	0	7.95	20.33	42.79	132.3	0	0	0	0	0	0	0	0	0	0	68.56	133.29	26.59	56.55	0	0	0	0	0	0	0	0
25	0	0	0	0	0	0	0	0	0	14.69	0	0	150.32	0	0	0	0	0	0	0	0	8.68	0.89	6.19	15.45	0	0	0.13	0.44	0	0	0	0	0	0	0	0	0.19	0.48	0	0	0	0	0.14	0.33	0	0	0	0
100	0	8.6	0	0	4.83	0	0	0	0	0	0	0	0	237.46	0	0	2.02	0	5.78	0	25.69	0.19	0	0	0	0	0	0	0	0	0	0	0	0	0	0	0	175.07	534.98	49.58	98.34	28.07	78.33	1.33	2.57	0	0	0	0
100	0	0	0	0	0	0	0	0	0	0	0	0.94	0	222.74	0	0	0	0	0	0	0	0	0	0	0	0	0	0.08	0.31	0	0	0	0	0	0	0	0	0	0	0	0	0	0	0.57	1.11	0	0	0	0
77	0.34	1.76	0	0	3.35	5.36	0	0	8.95	1.22	0	0.98	426.07	64.98	0	0	0	0	2.48	0	83.65	0	0	113.77	321.2	0	0	0	0	0	0	0	0	0	0	0	0	0	0	450.9	1023.67	0	0	39.51	89.43	0	0	33.91	87.94
100	0	201.15	0	0.7	1.47	0	0	0	0	259.97	0	0	0	170.25	0	223.33	8.12	0	19.97	0	65.39	0	0	1.89	4.44	0	0	0	0	536.48	1000.22	0	0	0	0	52.79	143.33	0	0	255.27	567.92	265.42	603.44	71.57	159.53	0	0	0	0
84	0	0	86.42	2.97	0	116.32	0	0	0	49.11	0	0	0	81.2	0	0	0	0	16.68	69.67	18.13	22.84	0	62.11	150.34	0	0	0	0	0	0	0	0	0	0	2.25	10.32	3.51	10.28	10.6	32.33	3.36	8.99	107	324.33	0	0	37.69	87.44
77	0	0	88.27	0	0.27	25.34	0	0	0	0	0	1.05	297.62	0	0	0	0	0	0.92	0.8	0	0	0	87.81	144.54	0	0	0	0	3.45	10.23	0	0	0	0	142.19	433.54	0	0	0	0	1.1	3.31	62.06	133.48	0	0	0	0
99	0	0	0	0	1.8	0	0	0	0	0	0	0	0	120.72	0	0	0	0	0.72	0	0	0	0	0	0	0	0	0	0	0	0	0	0	0	0	0	0	0	0	0	0	0	0	0	0	0	0	59.48	132.33
20	0	0	0	6.29	2.63	37.38	0	0	0	39.25	0	0	0	0	0	0	0	0	26.22	0	0	0	0	0	0	0	0	0	0	0	0	0	0	0	0	0	0	0	0	469.98	934.33	0	0	163.99	349.22	0	0	104.16	328.94
44	2.46	5.06	15.6	11.86	2.73	63.93	0.55	2.32	2.45	10.09	10.6	0	72.27	9.25	0	5.01	18.7	0	12.21	3.89	4.47	1.97	3.96	16.65	32.34	0	0	1.92	5.34	22.69	53.43	0	0	1.31	3.41	11.45	34.33	21.89	55.51	24.39	65.34	19.49	53.78	58.23	143.66	0	0	11.07	24.35
100	0	0	19.48	0	0	37.31	0	0	0	0	5.45	0	0	215.96	0	0	0	0	37.29	0	8.23	0	0	35.35	89.5	42.06	90.45	0	0	0	0	81.63	198.43	0	0	29.78	65.44	0	0	29.32	55.49	0	0	78.93	158.33	0	0	16.49	39.72
100	0.35	0	14.87	0	104.62	19.7	0	0	2.35	0	0	0	0	157.64	0	0	0	0	0	76.71	0	0	0	57.92	132.2	11.3	33.4	0	0	292.3	600.34	0	0	0	0	0	0	0	0	171.95	437.21	3.53	9.34	0	0	0	0	0	0
71	0	0	0	0	0	0	0	0	0	154.17	0	0.92	0	0	0	0	16.27	0	38.94	27.62	0.49	0	0	95.75	200.34	194.24	503.43	0.08	0.22	0	0	0	0	0	0	17.87	56.55	0	0	338.03	763.98	3.35	10.22	48.41	90.44	0	0	36.5	89.77
22	0.82	0	0	0	0	24.14	0	0	0	0	0	0	0	0	0	0	0	0	0	0	0	0	3.67	0	0	0	0	0	0	0	0	0	0	0	0	0	0	0	0	0	0	0	0	0	0	0	0	0	0
21	0	0	0	3.02	2	85.52	0	0	0	37.21	0	0	0	0	0	0	256	0	0	0	0.03	0	3.79	0	0	0	0	0	0	1.53	4.44	0	0	0	0	0	0	0	0	0	0	0.65	2.21	33.72	56.98	0	0	0	0
89	0	0	0	0	0	71.27	0	0	0	0	0	213.54	333.73	40.85	296.51	0	0	0.18	1.25	0	20.69	0	0	7.6	21.3	0	0	0	0	0	0	0	0	0	0	0	0	0	0	32.71	76.39	0	0	54.73	104.32	0	0	0	0
94	0	0	0	0	0	4.7	0	0	0	0	0	0	0	108.26	0	0	0	0	50.31	0	0	0	0	0.72	2.22	0	0	0	0	0	0	0	0	0	0	0	0	0	0	0	0	0	0	0.46	1.22	0	0	52.01	132.78
99	0	0	26.33	0	385.14	29.1	0	0	0	0	0	0	0.81	76.38	0	0	0.27	0	12.14	0	0	52.78	6.26	6.88	24.32	0	0	54.91	100.32	0	0	0	0	85.65	203.4	34.16	87.33	0	0	0.47	1.22	0	0	12.53	33.02	0	0	184.29	327.5
19	0.42	0	132.83	0	0	710.44	0	0	31.67	0	0	0	0	0	0	0	16.45	0	0	0	322.09	0	0	0	0	0	0	0.12	0.33	0	0	0	0	0	0	0.18	0.45	0	0	26.49	56.33	0	0	0.32	1.04	0	0	0	0
46	0	0	0	0	0	0	0	0	0	141.15	0	0	170.78	0	31.83	0	0	0	0	1.06	0	183.83	0	0	0	0	0	0	0	0	0	0	0	0	0	80.2	157.6	0	0	0	0	0.9	4.34	0.31	1.22	0	0	0	0
98	0	0	0	0	0	0	0	0	0	0	0	0	1545.9	0	0	0	0	0	0	54.4	0	0	4.43	0	0	0	0	0	0	0	0	0	0	1.12	2.21	0.4	1.3	0	0	0	0	0	0	656.4	1593.3	0	0	0	0
112	220	0	0	0	0	4.43	0	0	0	0	0	2.21	0.41	0	0	0	0	0	8.43	687.8	0	0	2.23	163.4	404.3	0	0	0.47	3.21	0	0	0	0	0	0	443.4	895.2	0	0	0	0	0.23	0.42	0	0	0	0	0	0
96	0	0	0	0	0	30.3	0	0	0	0	0	6.55	86.7	223.2	0	0	6.54	0	32.3	0	0	0	2.1	0	0	0.1	0.32	0	0	0	0	0	0	0	0	30.3	58.9	0	0	0	0	4.65	10.3	12.1	33.4	0	0	0	0
20	45.5	0	0	0	0	2.23	0	0	0	0	0	0	0	0	0	0	232.7	0	0	0	0	0	0	0	0	0	0	0	0	0	0	0	0	0	0	0	0	0	0	323.1	932.2	2.21	4.1	8.94	25.4	0	0	0	0
23	215.3	0	24.5	0	0	29.5	0	0	0	0	0	0	231.9	0	223.1	0	43.3	0	2.34	0	65.6	0	0	20.3	50.3	0	0	0	0	0	0	0	0	0.66	2.1	0	0	0	0	0	0	0	0	23.3	73.1	0	0	0	0
100	0	0	0.7	3.43	0	2.1	0	0	20.43	20.32	0	0	42.3	145.8	0	0	79.4	0	0	0	2.2	30.3	0	6.62	10.2	0	0	0	0	2.4	5.2	0	0	0	0	30.2	70.3	67.3	198.5	15.4	38.9	143.4	298.5	0	0	0	0	50.3	157.5
20	0	0	0	0	0	104.3	0	0	0	6.65	0	8.9	0	0	0	0	0	0	0	0	0	0	0	0	0	0	0	0	0	0	0	0	0	0	0	478.2	985.5	0	0	0	0	0	0	0	0	0	0	0	0
24	0	0	0	0	0	0	0	0	0	423.4	0	0	0	0	0	0	14.8	0	27.5	0	60.3	0	1.5	0.21	0.33	0	0	0	0	0	0	0	0	0	0	0	0	0	0	0	0	0	0	0	0	0	0	0	0
26	0	0	0	0	0	0	0	0	0	0.33	0	0	132.6	0	0	0	0	0	0.32	0	0	0	0	0	0	0	0	0	0	0	0	0	0	0	0	122.4	312.2	0	0	0	0	0.12	0.33	0	0	0	0	0	0
128	0	0	7.2	0	2.3	0	0	0	0	0	0	0	0	602.3	0	0	0	0	0	0	98.4	0	0	356.5	657.23	0	0	0	0	0	0	0	0	0	0	0	0	0	0	0	0	0	0	0	0	0	0	0	0
20	0.22	0	0	0	0	4.32	0	0	0	11.23	0	0	0	0	0	0	0	0	0.2	0	0.32	0	0	3.4	5.55	0	0	0	0	0	0	0	0	0	0	0	0	0	0	3.2	6.64	0.15	0.45	0	0	0	0	0	0
23	0.23	0	0	420.3	0	27.6	0	0	0	734.2	143.4	456.1	7835.3	0	0	0	0	0	0	0	0	0	0	0	0	0	0	0.37	2.21	0	0	0	0	0	0	0	0	0	0	0	0	0	0	0	0	0	0	0	0
66	0	0	13.5	245.1	0	5.6	0	0	143.4	7.21	2.21	232.2	64.2	0	0	0	0	0	0	176.6	6.5	0	0	203.4	453.4	0	0	0	0	0	0	0	0	0.21	0.44	67.4	189.5	0	0	0	0	0	0	0.8	4.1	0	0	0	0
83	0	0	136.5	0	0	89.4	0	0	10.43	0	0	0	0	0	134.3	0	0	0	0.22	13.2	42.3	3.2	0	50.4	98.5	0	0	0	0	0	0	0	0	0	0	7.03	13.3	0	0	132.2	354.1	176.5	365.5	4.4	12.4	0	0	0	0
90	0	365.4	0	2.23	1.87	2.23	0	0	125.4	0	0	0	0	2.21	0	0	0	0	0	0	4.2	0	1.76	0.33	3.31	0	0	0	0	0	0	0	0	0	0	143.3	289.1	0	0	45.9	185.3	0	0	5.23	12.9	0	0	42.3	123.1
102	0	0.32	25.66	0	0	0	0	0	0	0	0	0	0	398.5	0	0	0	0	0	0	0	0	0	0	0	0	0	0	0	0	0	0	0	0	0	0	0	0	0	0	0	0	0	0.15	0.45	0	0	0.21	0.42
53	0.65	2.21	5.21	1.87	1.33	50.45	0	0	5.54	11.2	4.33	3.31	13.3	2.21	0.67	1.21	4.43	0.32	7.32	2.51	4.54	1.56	4.23	3.1	14.5	1.2	2.65	0.1	0.32	14.3	30.2	0	0	4.42	13.2	7.43	14.2	0.89	4.45	10.4	38.9	6.63	12.4	35.6	95.12	0	0	9.4	18.4
122	0	24.56	0	0	0	0	0	0	0	15.6	5.21	0	0	0	0	0	0	0	0	769.4	341.2	189.4	478.4	102.2	300.2	0	0	0	0	0	0	0	0	0	0	0	0	0	0	70.4	265.5	4.43	9.4	0	0	0	0	0	0
45	0.7	0	0	0	0	0	0	0	0	0	0	0	2546.1	0	0	0	0	0	0	3.2	0	0	0	0	0	0	0	0	0	0	0	0	0	0	0	0	0	0	0	0	0	0.4	2.21	0	0	0	0	0	0
25	400.23	389.5	356.57	983.5	904.3	503.4	1385.5	3000.3	489.3	0	0	0	0	0	0	0	0	0	0	0	0	0	0	356.9	984.4	0	0	0	0	0	0	0	0	0	0	604.4	1324.1	0	0	0	0	53.1	125.4	0.27	2.1	0	0	0	0
23	0.31	80.2	67.82	1.39	0.5	0	0	0	0	0	0	342.3	324.8	0	43.45	43.4	0.12	20.3	34.3	0	83.3	0.32	0	40.3	100.1	16.7	40.5	0	0	61.3	130.2	24.4	53.4	33.7	85.5	0.4	1.13	14.5	34.5	0	0	50.4	132.8	34.1	93.5	145.3	223.1	48.9	84.3
25	0.39	0	0	0	0	0	0	0	0	0	0	0	0	0	0	0	0	0	0	0	0	0	0	0	0	0	0	0	0	0	0	0	0	0	0	13.2	33.4	0	0	0	0	5.5	12.6	2.21	4.1	0	0	0.3	0.41
40	0.45	0	0	0	10.34	0	0	0	0	0	0	0	0	1.32	0	0	265.8	0.21	0	0	0.65	0	0	286.3	434.2	0	0	0	0	0	0	0	0	0	0	3.4	8.91	0	0	689.4	1875.5	0.32	0.67	0	0	0	0	0	0
80	0	0	0	0	0	0.6	0	0	0	0	0	3.34	0	4.43	0	0	0	0.34	0	0	0	1.43	0	0	0	0	0	0	0	0	0	0	0	0	0	0.33	2.21	0	0	0	0	0.78	2.2	0	0	0	0	0	0
24	0.6	0	0	0	0	0	0	0	0	3.34	10.32	0.23	0	0	0	0	0.12	0	8.9	0	80.4	0	0	18.4	40.4	0.23	0.33	0	0	0	0	0	0	0.32	0.6	0	0	0	0	35.1	95.5	0.33	0.9	0	0	0	0	0.42	1.32
90	0	0	0	0	0.42	0	0.23	2.23	0.32	0	0	0	0	3.32	0	0	0	0	64.5	0	0	0	0	0	0	0	0	0	0	0	0	0	0	4.32	13.2	0	0	0	0	0	0	0	0	0	0	0	0	0	0
39	0.23	298.5	0	0	0	2.33	0	0	0	0	0	0.12	0	0.9	0	0	0	0	3.41	0	0.92	0	0	0.24	0.32	0	0	0	0	0	0	0	0	0	0	0.87	2.2	0	0	0	0	0	0	145.7	323.8	0	0	334.1	1023.4
72	0	18.8	7.3	0	0	26.5	0	0	103.2	23.2	50.45	0	276.8	0	0	0	40.3	0	6.2	89.4	23.2	1.84	0	34.4	56.7	0	0	0	0	0	0	0	0	0	0	25.5	67.8	0	0	42.3	98.5	18.6	40.3	15.9	45.2	1.2	334.5	35.6	89.4
156	0	0	0	0	0	3.32	0	0	0	0	0	0	0	989.3	423.6	343.2	578.3	145.5	203.4	0	0	58.9	0	0	0	0	0	0	0	0	0	78.5	189.5	0	0	2.1	3.2	0	0	0	0	0	0	189.5	564.5	0	0	0.21	0.63
90	1.01	0	0	0	0	0	0	0	0	0	0	0	203.3	48.9	0	0	0	0	0	0	0	0	0.51	0	0	0.21	0.34	0	0	126.4	245.5	0	0	0	0	0.1	0.41	0	0	11.3	303.3	0.35	2.21	0	0	0	0	0.42	1.43
102	0	0	0	7.72	0	0	0	0	0	0	0	0	0	11.32	0	0	0	0	0.3	0	0	0	0	52.3	87.9	0	0	0.3	1.1	0	0	0	0	0.23	0.43	0.24	1.88	0	0	0.2	0.54	0	0	23.4	58.9	0	0	113.5	436.7
84	0	0	0	0	0.44	503.4	0	0	0	0	0	0	0	0.89	0	0	0	0	0	0	0	0	0	0	0	0.14	0.31	0	0	0	0	0	0	0	0	0	0	0	0	223.1	465.2	0	0	0	0	0	0	0.05	0.44
55	0	0	0	2.65	0	104.5	20.23	40.34	0.66	105.2	0	0	67.2	38.93	0	0	6.22	0	12.8	5.23	0	0	0	0	0	38.9	89.5	0	0	0	0	2.2	4.43	0	0	63.4	129.8	0	0	115.3	330.6	24.9	75.5	121.8	340.4	0	0	0	0
70	0	0	0	0	0	6.63	0	0	0	34.3	0	0	0	95.6	0	0	0	0	17.4	0	0	0	24.3	441.2	897.4	0	0	0	0	2.21	4.3	0	0	0	0	0	0	0	0	0.43	3.22	3.2	5.4	0	0	0	0	0.32	0.9
20	155.4	0	0	0	0	0	0	0	0	0	0	0	0	0	0	0	0	0	0	0	40.3	0	0.55	4.56	8.95	0	0	0.11	0.43	0	0	0	0	0	0	0	0	0	0	704.4	2234.4	23.3	53.8	285.6	856.4	0	0	0	0
100	0	0	0	6.64	0	30.32	0	0	0	0	0	0	0	34.4	0	22.31	0	0	0	132.2	0	0	0	8.65	18.9	45.1	103.2	0	0	0	0	0	0	0	0	0	0	65.6	123.1	23.4	59.4	0	0	0	0	0	0	0	0
29	0	0	0	0	0	0	0	0	0	15.5	0	0	149.3	0	0	0	0	0	0	0	0	9.95	1.32	7.44	16.6	0	0	0.21	0.54	0	0	0	0	0	0	0	0	0.32	0.52	0	0	0	0	0.23	0.52	0	0	0	0
104	0	9.1	0	0	5.64	0	0	0	0	0	0	0	0	249.8	0	0	3.27	0	6.34	0	24.5	0.32	0	0	0	0	0	0	0	0	0	0	0	0	0	0	0	156.9	465.6	45.5	132.2	32.1	85.6	1.89	3.1	0	0	0	0
102	0	0	0	0	0	0	0	0	0	0	0	1.31	0	231.9	0	0	0	0	0	0	0	0	0	0	0	0	0	0.11	0.33	0	0	0	0	0	0	0	0	0	0	0	0	0	0	0.42	1.5	0	0	0	0
80	0.3	1.8	0	0	4.23	6.55	0	0	9.54	2.21	0	1.12	436.1	65.6	0	0	0	0	3.3	0	80.4	0	0	129.1	300.4	0	0	0	0	0	0	0	0	0	0	0	0	0	0	423.3	986.6	0	0	34.7	95.6	0	0	38.9	94.5
99	0	200.3	0	1.2	2.23	0	0	0	0	265.5	0	0	0	187.4	0	276.4	9.23	0	21.3	0	66.3	0	0	2.21	4.51	0	0	0	0	502.3	984.5	0	0	0	0	55.6	136.6	0	0	234.1	656.2	243.3	567.3	68.3	149.6	0	0	0	0
85	0	0	78.9	2.56	0	120.4	0	0	0	50.3	0	0	0	83.2	0	0	0	0	20.4	70.4	20.2	23.4	0	56.7	143.4	0	0	0	0	0	0	0	0	0	0	2.31	8.92	3.4	9.8	4.4	30.2	2.34	9.4	103.1	404.1	0	0	34.1	96.2
78	0	0	90.3	0	0.34	23.3	0	0	0	0	0	1.34	324.1	0	0	0	0	0	1.2	1.1	0	0	0	88.3	135.4	0	0	0	0	4.42	6.76	0	0	0	0	134.4	400.2	0	0	0	0	1	3.1	64.5	165.9	0	0	0	0
85	0	0	90.57	0	0.22	22.2	0	0	0	0	0	1.9	225.4	0	0	0	0	0	1	0.9	0	0	0	67.5	133.9	0	0	0	0	3.3	5.56	0	0	0	0	123.8	356.1	0	0	0	0	1.5	4.7	59.3	140	0	0	0	0
[truncated: 9 more columns]
