# Supplementary material for: Single-cell-level protein analysis revealing the roles of autoantigen-reactive B lymphocytes in autoimmune disease and the murine model
Source: eLife. 2021 Dec 2;10:e67209. doi: 10.7554/eLife.67209 (PMC8639144; doi:10.7554/eLife.67209)
Supplement: Figure 3—source data 1. — This archive contains all data used for the quantitative analysis shown in Figure 3. [file elife-67209-fig3-data1.xlsx]

## Sheet: Fig 3A
FOXP3	Comp	Comp+T	low	low+T	high	high+T
	1	1.1	1.2	1	1.1	0.9
	0.9	0.7	0.7	1.1	0.8	0.8
	0.8	1	0.8	1.4	0.8	0.7
	0.7	0.6	0.6	0.8	0.6	1.1
	1.1	1	1.1	0.9	0.4	1.2
	1	1	1	1	1	1
	1	1.2	1.2	0.6	1.2	0.8
RORC	Comp	Comp+T	low	low+T	high	high+T
	0.9	1	1	0.8	1	1.1
	1	1.1	1	0.9	1.1	0.9
	0.8	0.8	0.8	1.3	0.9	0.8
	0.8	0.7	0.8	1.1	0.9	1.1
	0.9	0.9	0.9	0.9	1.4	1.2
	1	0.9	1	0.8	1	1
	1	1	1.2	0.8	0.6	0.7

## Sheet: Fig 3C
FOXP3	Comp	Comp+T	low	low+T	high	high+T
	0.8	0.6	1	3.2	1	0.9
	0.7	0.7	0.9	4.1	0.8	0.8
	0.6	0.9	0.8	5	0.7	0.6
	0.8	1	0.5	4.6	0.6	1
	0.9	1.1	1.2	4.9	0.2	1.2
	0.9	1	1	4.7	1	1
	1	0.9	1.3	5.6	1	0.5
RORC	Comp	Comp+T	low	low+T	high	high+T
	0.9	0.8	1	0.8	1.2	2.3
	0.8	0.9	0.9	0.5	1.1	4.2
	0.7	1.1	0.8	1.3	0.9	4
	1	1.2	0.6	1.1	0.8	3.5
	1	1	0.7	0.9	1.4	3.8
	1	1	1	0.8	1.1	4
	0.9	0.9	1.2	0.7	0.6	3.1

## Sheet: Fig 3D
Foxp3	none	low	high
	0	100	0
	1	94	0
	0	84	1
	0	77	1
	1	83	0
	1	95	1
	1	96	1
	2	67	1
	1	73	2
	2	56	2
RORgt	none	low	high
	0	0	100
	2	0	91
	1	0	88
	0	1	70
	0	0	82
	0	1	79
	1	0	56
	1	1	66
	1	2	73
	2	2	58

## Sheet: Fig 3E
Foxp3	con	anti-IL-10	anti-IL-35
	100	11	12
	92	12	14
	80	22	19
	73	21	20
	66	16	22
	53	7	5
	67	8	3
	85	5	8
	97	9	7
	70	12	10
RORgt	con	anti-IL-6	anti-IL-23
	100	13	12
	90	19	10
	80	22	10
	73	21	9
	86	5	4
	73	8	6
	61	7	8
	60	9	22
	71	11	21
	55	19	24
