# Supplementary material for: Single-cell-level protein analysis revealing the roles of autoantigen-reactive B lymphocytes in autoimmune disease and the murine model
Source: eLife. 2021 Dec 2;10:e67209. doi: 10.7554/eLife.67209 (PMC8639144; doi:10.7554/eLife.67209)
Supplement: Figure 4—figure supplement 1—source data 1. — This archive contains all data used for the quantitative analysis shown in Figure 4—figure supplement 1. [file elife-67209-fig4-figsupp1-data1.xlsx]

## Sheet: Fig 4S1A
Topo I-non-reactive	Topo I-reactive
2.6	11
4.4	12
4.5	12.2
6.7	13.3
7.1	13.2
5.5	15
4	18
9.2	19
8.3	22
5.6	21
6.1	23
2.4	20
7.6	18
4.5	14
3.6	15
1.1	13.5
1.5	14.6
1.8	15.6
2.1	16.6
2.5	19.9
2	42
4	54
4	42
6	46
7	49
5.2	50
4.4	65.5
9	66.7
8	53.3
5.2	58.6
6	56
2	40
7.3	53.3
4.2	43.6
3.8	54.4
1.4	55.6
1.3	57.6
1	59.8
2	62.3
2.2	43.3
2.5	44.3
4.1	47.6
4.4	43.2
6.9	50.2
7	48.9
5.1	51.2
4	65.5
9	64.5
8.5	53.4
5.6	58.7
7	55.7
2.2	43.2
5.7	54.8
5	41.2
3.1	52.3
1	53.4
1	55.6
2	57.6
2	57.8
2.2	40.3
2.2	41.3
4.4	51.2
4.6	41.3
6.2	44.5
7	46.7
5.9	47.8
4.4	62.3
9.6	62.8
8.1	51.3
5.2	55.3
6	53.2
2.9	40.4
7.7	52.2
4.8	40.5
3.1	51.2
1	51.3
1.9	55.6
1.9	56.5
2.6	57.6
2.9	40.3
2.5	41.2
4	52.3
4.2	40.5
6.3	44.5
7.7	48.9
5.2	56.4
4	63.2
9	60.4
8	50.2
5	55.3
6	52.3
2.3	44.5
6.9	53.4
6.6	40.6
5.5	51.2
2.1	56.4
1.1	59.8
1	63.2
2	66.5
2.3	40.2

## Sheet: Fig 4S1C
	Low	High
IL-10	4	1
	4	1
	3.3	1.2
	3	0.9
	4.2	0.7
	2.6	0.5
	3.2	0.3
	3.7	0.2
	3.5	0.3
	4.4	0.2
IL-35	1.2	0.4
	1.3	0.4
	1.4	0.4
	1.5	0.5
	1.6	0.7
	1.6	0.2
	1.1	0.2
	1.2	0.2
	1.4	0.6
	1.7	0.9
IL-6	9	13
	6	27
	7	22
	5.5	21
	7	18
	9.3	13
	5.3	14
	5.5	22
	7.5	17
	9.6	33
IL-23	4.2	11
	4	13
	3.2	15
	4.5	15
	2.7	16
	4	17
	5	11
	5.5	11
	7	9
	6.3	9.3
IL-2	4	5.3
	4.1	4.4
	4	4.2
	5	4.8
	3	4
	4	6
	5	5
	5	5
	5	4
	5	4
TGF-b1	1	2
	1.5	1
	2	1.5
	2.3	2
	1.4	3
	2.5	1
	1.6	2
	1.8	1
	0.9	0.5
	1.2	1

## Sheet: Fig 4S1D
Topo I-r	Topo I-nr
95	2.5
97	7
91	1.2
90	4
97	3
100	2.7
99	5.8
93	4.2
94	6.1
94	7
