# Supplementary material for: Single-cell-level protein analysis revealing the roles of autoantigen-reactive B lymphocytes in autoimmune disease and the murine model
Source: eLife. 2021 Dec 2;10:e67209. doi: 10.7554/eLife.67209 (PMC8639144; doi:10.7554/eLife.67209)
Supplement: Figure 4—source data 1. — This archive contains all data used for the quantitative analysis shown in Figure 4. [file elife-67209-fig4-data1.xlsx]

## Sheet: Fig 4B
Dermal thickness	PBS-0	PBS-1	PBS-4	Topo I-0	Topo I-1	Topo I-4
	102	105	103	90	120	140
	105	110	104	99	105	144
	110	113	110	103	109	136
	107	102	106	109	110	129
	100	97	99	113	96	139
	92	93	90	104	106	141
Lung fibrosis score	PBS-0	PBS-1	PBS-4	Topo I-0	Topo I-1	Topo I-4
	0	0	0	0	1	4
	0	0	0	0	1	4
	1	1	1	1	2	5
	1	1	1	1	0	6
	1	0	0	1	0	5
	0	1	1	0	1	7

## Sheet: Fig 4D
CTL	1st immunized	4th immunized
0.05	0.8	2
0.04	0.84	2.4
0.03	0.92	2.2
0.06	0.76	1.8
0.054	0.74	1.7
0.052	0.87	1.6

## Sheet: Fig 4E
	Comp																				TopoI
CTL	4.2	5.5	9.5	9.2	8.3	5.6	6.1	2.4	7.6	4.5	3.6	1.1	1.5	1.8	2.1	2.5	2.6	2.8	3.1	3.2	8	3.7	3.8	3.9	4.2	4.1	4.5	4.4	4.7	5.2	5.3	5.1	5.8	5.9	6.4	6.8	6.6	7	7.5	7.7
1st immunized	8.2	7.6	7.3	7.4	7.1	10	4	5.6	5.5	2	1.9	3.1	3.4	3.3	3.6	3.7	3.8	4.1	4.2	2	11	12	12.5	13.6	13.7	14.8	19.2	14.3	14.4	14.7	15.3	16.5	17.6	17.2	17.8	16.1	17.6	18.5	19.2	15.5
4th immunized	2.6	4.4	4.5	6.7	7.1	5.5	4	9.2	8.3	5.6	6.1	2.4	7.6	4.5	3.6	1.1	1.5	1.8	2.1	2.5	50	65.2	64	52.3	56.4	56	40	53.2	43	54	55	57	59	60	41	42.1	54.3	42	46	49

## Sheet: Fig 4G
IL-10	1st immunized	4th immunized	IL-35	1st immunized	4th immunized	IL-6	1st immunized	4th immunized	IL-23	1st immunized	4th immunized	IL-2	1st immunized	4th immunized	TGF-b1	1st immunized	4th immunized
	4.3	0.9		1.3	0.4		8.9	12		4	12		4.2	5.1		1	2.2
	4	1		1.35	0.5		6	26		4.1	13		4.1	4.4		1.3	1.1
	3.6	1.1		1.42	0.4		7.3	36		3.3	14.3		4	4.2		2	1.4
	3	0.8		1.5	0.6		5.6	21		4.3	15		5.1	4.6		2.2	2.1
	4.2	0.7		1.55	0.7		7	19		2.8	14.7		3.2	3.8		1.1	2.9
	2.9	0.6		1.6	0.3		9	14.3		4	15.6		4.2	6		2.5	1.1
	3	0.2		1.1	0.2		5	14		4.5	11.2		4.5	5		1.4	2.1
	3.2	0.3		1.22	0.1		5.3	20		5.5	10.9		4.6	4.8		1.8	1
	3.1	0.4		1.45	0.6		7.4	15		6	9		4.8	4		0.9	0.3
	4.9	0.1		1.6	0.8		9.6	32		6.3	9.3		5	3.5		1	1
