# Supplementary material for: Single-cell-level protein analysis revealing the roles of autoantigen-reactive B lymphocytes in autoimmune disease and the murine model
Source: eLife. 2021 Dec 2;10:e67209. doi: 10.7554/eLife.67209 (PMC8639144; doi:10.7554/eLife.67209)
Supplement: Figure 5—source data 1. — This archive contains all data used for the quantitative analysis shown in Figure 5. [file elife-67209-fig5-data1.xlsx]

## Sheet: Fig 5 mRTSS
mRSS	High/Low
28	1.22222
29	1.5
17	1.08333
19	1.04082
25	1.08333
27	1.17391
29	1.27273
20	1.08333
25	1.08333
22	1.38095
16	1.04082
17	1.04082
23	1.12766
28	1.12766
23	1.27273
32	1.5
31	1.5641
28	2.0303
26	1.27273
25	1.38095
27	1.12766
24	1.43902
23	1.5
22	1.5641
21	1.7027
17	1.08333
15	1.12766
16	1.22222
19	1.08333
14	1.38095
16	1.5
13	1.22222
33	1.27273
24	1.12766
26	1.08333
29	1.04082
20	1.04082
21	1.04082
24	1.08333
23	1.12766
25	1.22222
26	1.12766
28	1.12766
29	1.7027
32	1.94118
26	2.0303
25	2.125
24	2.22581
28	2.33333
16	1.27273
17	1.12766
15	1.22222
19	1.04082
22	1.12766
24	1.17391
25	1.38095
28	1.12766
21	1.04082
10	0.818182
14	0.785714
16	0.851852
10	0.666667
14	0.724138
11	0.666667
13	0.785714
12	0.724138
15	0.666667
13	0.785714
21	0.724138
14	0.694915
11	0.785714
22	0.470588
23	0.694915
24	0.666667
18	0.818182
19	0.923077
16	0.886792
17	0.960784
18	0.724138
16	0.754386
19	0.960784
15	0.923077
14	0.724138
12	0.515152
13	0.5625
11	0.428571
10	0.470588
21	0.408451
23	0.515152
24	0.724138
26	0.818182
22	0.785714
21	0.754386
23	0.666667
22	0.754386
21	0.724138
14	0.851852
15	0.818182
17	0.886792
16	0.785714
18	0.694915
19	0.666667
13	0.666667
14	0.694915
11	0.666667
14	0.639344
15	0.612903
16	0.612903
13	0.449275
14	0.470588
13	0.886792

## Sheet: Fig 5 %FVC
%FVC	High/Low
70	1.22222
60	1.5
71	1.08333
75	1.04082
85	1.08333
77	1.17391
78	1.27273
79	1.08333
65	1.08333
62	1.38095
70	1.04082
73	1.04082
83	1.12766
75	1.12766
80	1.27273
78	1.5
79	1.5641
67	2.0303
60	1.27273
56	1.38095
67	1.12766
69	1.43902
70	1.5
65	1.5641
53	1.7027
59	1.08333
62	1.12766
63	1.22222
64	1.08333
66	1.38095
72	1.5
73	1.22222
71	1.27273
75	1.12766
76	1.08333
80	1.04082
83	1.04082
82	1.04082
75	1.08333
72	1.12766
78	1.22222
74	1.12766
68	1.12766
67	1.7027
66	1.94118
61	2.0303
60	2.125
58	2.22581
59	2.33333
63	1.27273
66	1.12766
87	1.22222
88	1.04082
83	1.12766
63	1.17391
60	1.38095
64	1.12766
80	1.04082
100	0.818182
95	0.785714
90	0.851852
90	0.666667
93	0.724138
110	0.666667
103	0.785714
102	0.724138
90	0.666667
93	0.785714
92	0.724138
91	0.694915
102	0.785714
110	0.470588
89	0.694915
90	0.666667
84	0.818182
74	0.923077
79	0.886792
78	0.960784
83	0.724138
82	0.754386
67	0.960784
66	0.923077
91	0.724138
90	0.515152
96	0.5625
102	0.428571
105	0.470588
113	0.408451
94	0.515152
95	0.724138
99	0.818182
96	0.785714
83	0.754386
87	0.666667
88	0.754386
89	0.724138
73	0.851852
71	0.818182
77	0.886792
78	0.785714
88	0.694915
89	0.666667
83	0.666667
80	0.694915
92	0.666667
94	0.639344
96	0.612903
99	0.612903
101	0.449275
110	0.470588
101	0.886792

## Sheet: Fig 5 %DLco
%DLco	High/Low
45	1.22222
40	1.5
57	1.08333
52	1.04082
89	1.08333
60	1.17391
55	1.27273
74	1.08333
40	1.08333
44	1.38095
55	1.04082
50	1.04082
88	1.12766
63	1.12766
56	1.27273
40	1.5
42	1.5641
52	2.0303
45	1.27273
44	1.38095
56	1.12766
60	1.43902
66	1.5
65	1.5641
45	1.7027
40	1.08333
53	1.12766
55	1.22222
52	1.08333
59	1.38095
58	1.5
56	1.22222
61	1.27273
63	1.12766
64	1.08333
70	1.04082
71	1.04082
70	1.04082
67	1.08333
60	1.12766
66	1.22222
64	1.12766
69	1.12766
51	1.7027
50	1.94118
48	2.0303
56	2.125
58	2.22581
52	2.33333
53	1.27273
55	1.12766
68	1.22222
66	1.04082
61	1.12766
45	1.17391
40	1.38095
44	1.12766
75	1.04082
80	0.818182
77	0.785714
75	0.851852
90	0.666667
88	0.724138
92	0.666667
90	0.785714
85	0.724138
75	0.666667
72	0.785714
90	0.724138
84	0.694915
90	0.785714
88	0.470588
85	0.694915
82	0.666667
81	0.818182
80	0.923077
78	0.886792
71	0.960784
74	0.724138
72	0.754386
68	0.960784
69	0.923077
63	0.724138
66	0.515152
65	0.5625
61	0.428571
90	0.470588
99	0.408451
89	0.515152
88	0.724138
83	0.818182
85	0.785714
92	0.754386
91	0.666667
94	0.754386
95	0.724138
90	0.851852
96	0.818182
97	0.886792
98	0.785714
99	0.694915
80	0.666667
84	0.666667
83	0.694915
86	0.666667
92	0.639344
90	0.612903
83	0.612903
80	0.449275
81	0.470588
87	0.886792
