# Supplementary material for: Single-cell-level protein analysis revealing the roles of autoantigen-reactive B lymphocytes in autoimmune disease and the murine model
Source: eLife. 2021 Dec 2;10:e67209. doi: 10.7554/eLife.67209 (PMC8639144; doi:10.7554/eLife.67209)
Supplement: Figure 6—figure supplement 1—source data 1. — This archive contains all data used for the quantitative analysis shown in Figure 6—figure supplement 1. [file elife-67209-fig6-figsupp1-data1.xlsx]

## Sheet: Fig 6S1B
Skin	PBS-0	PBS-1	Topo I-0	Topo I-1		Lung	PBS-0	PBS-1	Topo I-0	Topo I-1
	100	104	92	122			0	0	0	0
	103	109	98	106			0	0	0	1
	111	112	102	110			0	0	0	2
	109	100	106	112			1	1	1	1
	102	96	112	97			1	0	1	0
	96	92	105	109			0	1	0	1

## Sheet: Fig 6S1C
PBS	Topo I
0.05	0.9
0.04	0.88
0.03	0.97
0.06	0.78
0.054	0.79
0.052	0.88

## Sheet: Fig 6S1D
	Comp																				Topo I
CTL	4	5	9	9	0.1	5.5	6.4	2.1	7.7	4.2	3.3	1	1.2	1.4	2	2.9	2.4	2.2	3	3.1	8.2	3.3	3.5	3.1	4	4	4.4	4.1	4.9	5.1	5.5	5.4	5.9	6	6.2	6.6	6.9	7.3	7.7	7.9
1st immunized	8.1	7.7	7.2	7.4	7	12.1	4.2	5.2	5	2.3	2	3	3.1	3.3	3.5	3.3	3.9	4	4	2.1	10	11	12.1	13.3	13	14	19	14.2	14.9	13.4	15.3	18.4	15.6	17	17.3	16	16.9	18	19	15.6

## Sheet: Fig 6S1F
	Incomplete	Complete
IL-10	4	1
	4.1	0.9
	3.3	1
	3.2	0.88
	4	0.73
	2.6	0.63
	3.1	0.21
	3	0.33
	3.5	0.42
	4.5	0.13
IL-35	1.2	0.33
	1.33	0.45
	1.4	0.42
	1.53	0.6
	1.5	0.73
	1.57	0.35
	1.06	0.23
	1.2	0.14
	1.4	0.56
	1.55	0.77
IL-6	8.8	11
	6.2	24
	7.1	34
	5.5	20
	7.3	18
	9.3	15
	5.6	16
	5.2	21
	7.2	18
	9.3	30
IL-23	3.8	11
	4	12
	3.1	14.3
	4.1	15.2
	2.7	14.8
	4.1	15.5
	4.4	10.2
	5.2	10.6
	6.2	9.5
	6.1	9.8
IL-2	4.1	5
	4	4.2
	4	4.1
	5	4.4
	3.1	3.9
	4.8	5.8
	4.7	5
	4.5	4.6
	4.9	4
	5.2	3.3
TGF-b1	0.9	2.1
	1.2	1
	2.2	1.3
	2.1	2
	1	2.7
	2.3	1
	1.5	2.2
	1.9	1.4
	0.8	0.4
	1.2	1

## Sheet: Fig 6S1H
Skin	Non	Incomplete		Lung	Non	Incomplete
	130	120			4	3
	140	99			4	3
	134	102			5	3
	130	108			5	2
	133	112			5	1
	140	103			5	2

## Sheet: Fig 6S1J
Skin	Non	Incomplete		Lung	Non	Incomplete
	89	92			0	0
	93	97			1	1
	94	100			1	1
	88	100			0	1
	102	96			0	0
	101	102			0	0
