# Supplementary material for: Single-cell-level protein analysis revealing the roles of autoantigen-reactive B lymphocytes in autoimmune disease and the murine model
Source: eLife. 2021 Dec 2;10:e67209. doi: 10.7554/eLife.67209 (PMC8639144; doi:10.7554/eLife.67209)
Supplement: Figure 6—figure supplement 2—source data 1. — This archive contains all data used for the quantitative analysis shown in Figure 6—figure supplement 2. [file elife-67209-fig6-figsupp2-data1.xlsx]

## Sheet: Sheet1
Skin	WT	PRDM1 CKO	Class II CKO		Lung	WT	PRDM1 CKO	Class II CKO
	135	133	102			3	4	1
	128	129	100			4	4	0
	126	124	98			3	3	1
	125	123	99			2	3	0
	132	130	103			4	2	1
	126	127	105			4	4	0
