# Supplementary material for: Single-cell-level protein analysis revealing the roles of autoantigen-reactive B lymphocytes in autoimmune disease and the murine model
Source: eLife. 2021 Dec 2;10:e67209. doi: 10.7554/eLife.67209 (PMC8639144; doi:10.7554/eLife.67209)
Supplement: Figure 6—source data 1. — This archive contains all data used for the quantitative analysis shown in Figure 6. [file elife-67209-fig6-data1.xlsx]

## Sheet: Fig 6B
Skin	Ctrl	Topo(1)	Topo(4)		Lung	Ctrl	Topo(1)	Topo(4)
	135	122	165			4	4	7
	142	99	176			4	3	8
	139	103	160			5	3	7
	132	109	150			6	2	6
	139	113	147			5	1	6
	140	104	140			5	2	7

## Sheet: Fig 6D
Skin	Ctrl	Topo(1)	Topo(4)		Lung	Ctrl	Topo(1)	Topo(4)
	90	93	134			0	0	3
	95	98	133			1	0	4
	92	102	128			1	1	2
	87	100	130			0	1	4
	100	95	129			0	0	3
	102	102	127			0	0	3

## Sheet: Fig 6E
Skin	con	anti-IL-6	anti-IL-23		Lung	con	anti-IL-6	anti-IL-23
	136	90	93			3	0	0
	133	98	95			3	1	1
	129	99	91			2	0	0
	130	100	89			3	0	1
	128	98	99			4	1	0
	126	102	102			3	1	1

## Sheet: Fig 6F
Skin	WT	IL-6 KO	IL-23 KO		Lung	WT	IL-6 KO	IL-23 KO
	134	90	100			3	0	1
	130	97	99			3	0	1
	127	100	97			2	1	0
	126	92	90			3	0	0
	130	90	100			4	0	0
	127	100	102			3	1	0
