# Supplementary material for: Single-cell-level protein analysis revealing the roles of autoantigen-reactive B lymphocytes in autoimmune disease and the murine model
Source: eLife. 2021 Dec 2;10:e67209. doi: 10.7554/eLife.67209 (PMC8639144; doi:10.7554/eLife.67209)
Supplement: Figure 7—figure supplement 1—source data 1. — This archive contains all data used for the quantitative analysis shown in Figure 7—figure supplement 1. [file elife-67209-fig7-figsupp1-data1.xlsx]

## Sheet: Figure 7-figure supplement 1
Change of mRSS from baseline			Change of Anti-Topo I antibody from baseline
-6			-6
-5			5
-4			3
-7			-1
-8			-10
-11			11
-4			-4
-6			7
-7			2
-8			3
