# Supplementary material for: Single-cell-level protein analysis revealing the roles of autoantigen-reactive B lymphocytes in autoimmune disease and the murine model
Source: eLife. 2021 Dec 2;10:e67209. doi: 10.7554/eLife.67209 (PMC8639144; doi:10.7554/eLife.67209)
Supplement: Figure 7—source data 1. — This archive contains all data used for the quantitative analysis shown in Figure 7. [file elife-67209-fig7-data1.xlsx]

## Sheet: Fig 7A
Topo I	Topo I + BTKi
2.1	0.88
2.5	0.85
2	0.95
1.9	0.77
1.6	0.7
1.5	0.88

## Sheet: Fig 7B-1
Skin	Topo I	Topo I+BTKi		Lung	Topo I	Topo I+BTKi
	166	123			7	3
	177	100			8	3
	158	103			7	3
	152	110			7	2
	148	113			6	1
	142	105			7	2

## Sheet: Fig 7B-2
Topo I																				Topo I+BTKi
44.5	62	63.2	50.7	58.3	55.1	42.3	51.2	41.8	51.2	54.2	59.4	57.1	61.2	42.3	44.3	55.6	41.8	45.6	50.3	10.2	11.2	11.3	8.9	9.9	13.2	16.7	13.2	13.3	15.5	19.3	16.5	17.6	17.7	17.8	16.1	19.2	13.2	19.2	15.5

## Sheet: Fig 7D
	TopoI	TopoI+BTKi
IL-10	0.9	4.3
	1	4.1
	1	3.6
	0.8	3.1
	0.7	4.2
	0.6	3
	0.4	3
	0.3	3.2
	0.4	3.3
	0.2	4.9
IL-35	0.4	1.4
	0.5	1.35
	0.5	1.42
	0.6	1.53
	0.6	1.55
	0.3	1.6
	0.2	1.2
	0.2	1.22
	0.6	1.45
	0.7	1.7
IL-6	15	8.9
	26	5.5
	36	7
	20	5.6
	19	7
	14.8	8.6
	14	5
	18.9	5.1
	15	7.4
	30	9.2
IL-23	12	4
	11	4.2
	14.3	3.3
	15	4.2
	14	2.8
	15.6	3.8
	11.2	4.1
	10.3	5.5
	9	5.7
	9.7	6
IL-2	4	5.1
	4.1	4.4
	4	4
	5	4.6
	3.2	3.8
	4.2	5.3
	4.2	5
	4.6	4.8
	4.4	4
	5	3.3
TGF-b1	1.2	2.1
	1.3	1.1
	2	1.3
	2.2	2.1
	1	2.9
	2.5	1.2
	1	2.1
	1.8	1
	0.9	0.5
	1	1

## Sheet: Fig 7E
Skin	Topo I	Topo I+BTKi		Lung	Topo I	Topo I+BTKi
	132	94			3	0
	133	98			3	1
	121	105			3	0
	130	100			4	1
	133	97			3	0
	125	102			3	0
