# Supplementary material for: Single-cell-level protein analysis revealing the roles of autoantigen-reactive B lymphocytes in autoimmune disease and the murine model
Source: eLife journal article supplement (doi:10.7554/elife.67209), 2021-11-22
Supplement: figures [file elife-67209-figures-v1.pdf]

---

## Figures and figure supplements

Single-cell-level protein analysis revealing the roles of autoantigen-reactive B lymphocytes in autoimmune disease and the murine model

**Takemichi Fukasawa *et al***

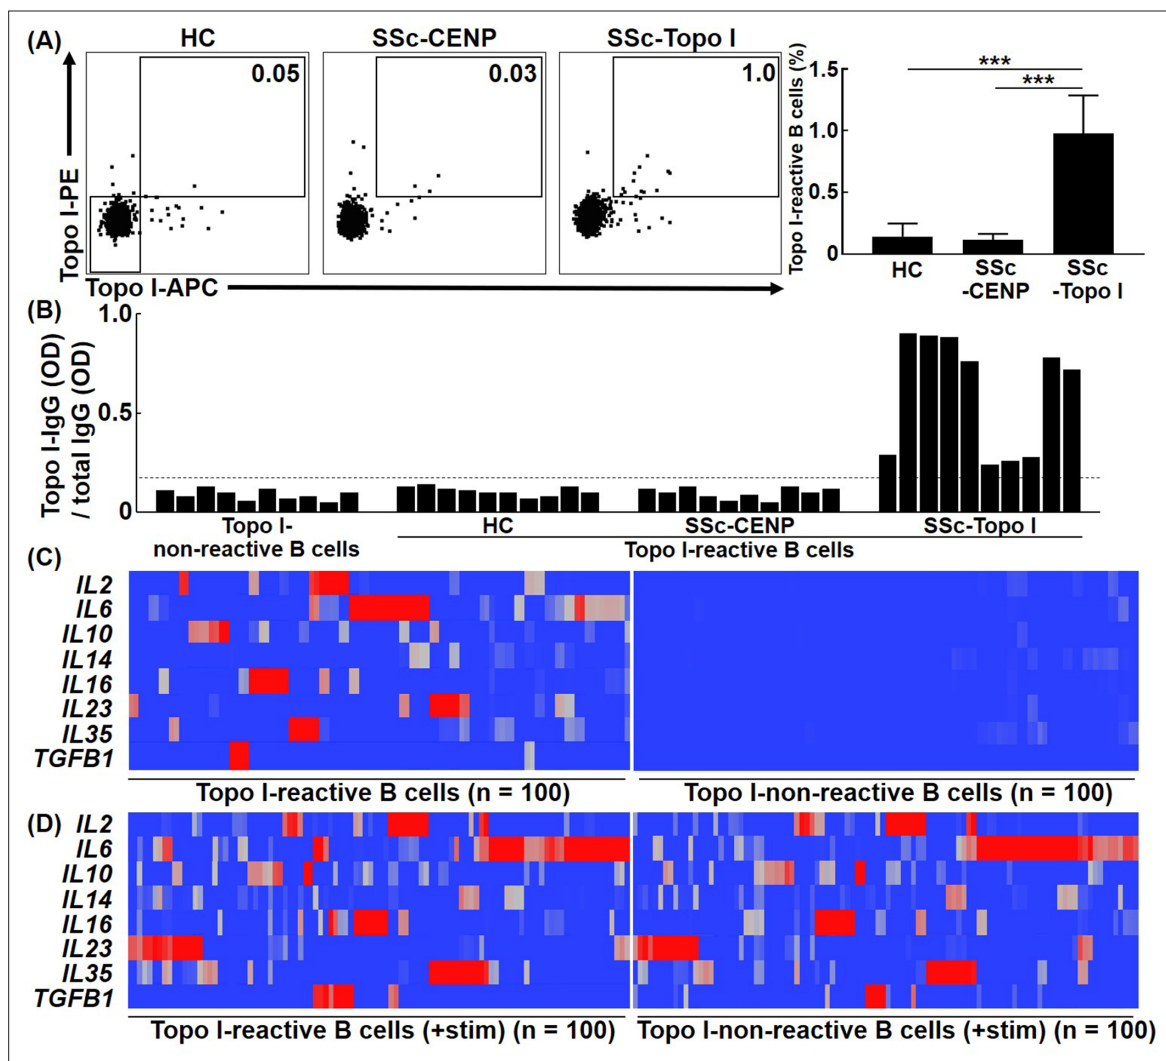

**Figure 1.** Frequencies and cytokine production ability of topo I-reactive B cells in systemic sclerosis (SSc) patients. **(A)** Frequencies of topo I-reactive cells in CD27<sup>+</sup> CD19<sup>+</sup> cells obtained from the peripheral blood of 50 healthy controls (HC), 50 anti-CENP antibody-positive SSc patients, and 111 anti-topo I antibody-positive SSc patients were examined with flow cytometric analysis. Topo I-PE<sup>+</sup> topo I-APC<sup>+</sup> cells were identified as topo I-reactive B cells. Topo I-PE<sup>+</sup> topo I-APC<sup>+</sup> cells were used as topo I-non-reactive B cells in the following experiments. The bar graphs show the mean + SD. \*\*\*p<0.005. **(B)** Topo I-reactive B cells were isolated using a cell sorter and subjected to single-cell culture for 48 hr. Subsequently, levels of IgG anti-topo I antibody and total IgG in the supernatant were measured using the  $\mu$ ELISA system. The IgG anti-topo I antibody titer produced by each B cell was determined by dividing the IgG anti-topo I antibody OD value by the total IgG OD value. Data for 10 cells in each group are represented. The dotted line represents IgG anti-topo I antibodies with an average titer of +6 SD. **(C)** Real-time-RT-PCR for cytokines was performed at the single-cell level using topo I-reactive B cells and topo I-non-reactive B cells, 100 each, obtained from anti-topo I antibody-positive SSc patients, and is shown in the heatmap. The color of the heatmap indicates the degree of mRNA expressions, which are higher as the color of the heatmap changes from blue to red. **(D)** Upon stimulation with PMA and ionomycin, both topo I-reactive CD27<sup>+</sup> B cells and topo I-non-reactive CD27<sup>+</sup> B cells produced a variety of cytokines and showed similar cytokine profiles.

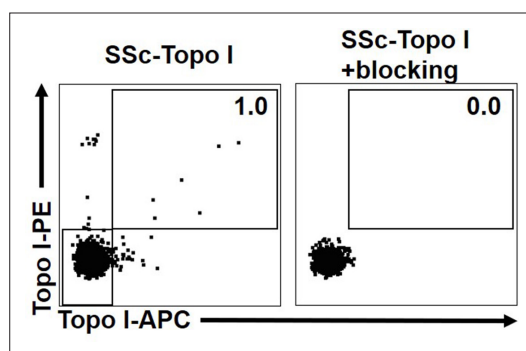

**Figure 1—figure supplement 1.** Blocking effect of topo I to frequencies of topo I-reactive B cells in anti-topo I antibody-positive systemic sclerosis (SSc) patients. Topo I-reactive B cells in CD27<sup>+</sup>CD19<sup>+</sup> cells obtained from anti-topo I antibody-positive SSc patients were flow cytometric pre-blocked with excess topo I.

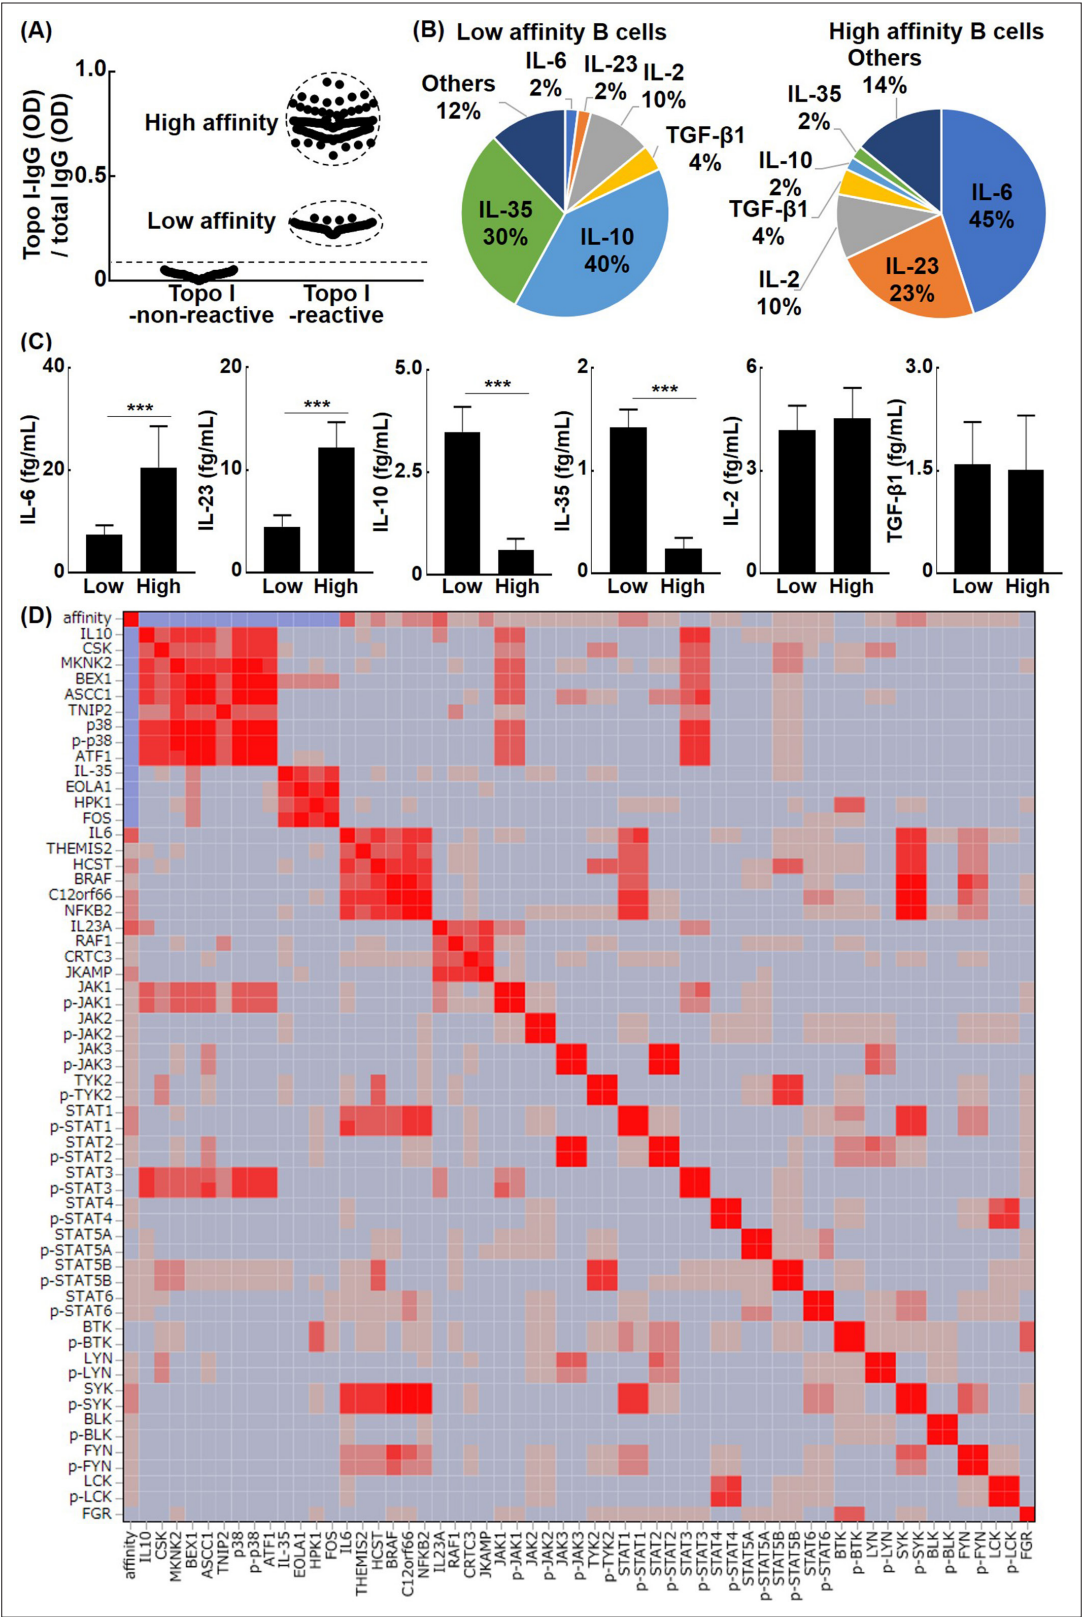

**Figure 2.** The relationship between the affinity for topo I in topo I-reactive B cells and their ability to produce cytokines in systemic sclerosis (SSc) patients. (A) Topo I-non-reactive B cells and topo I-reactive B cells were isolated from the peripheral blood of anti-topo I antibody-positive SSc patients, and topo I titers were measured at the single B cell level. Topo I-reactive B cells were divided into two groups: B cells with low or high affinity for

Figure 2 continued on next page



*Figure 2 continued*

topo I. **(B)** The frequency of B cells producing each cytokine is represented in the pie charts. **(C)** The amount of each cytokine produced by these cytokine-producing B cells was measured. For these experiments, each of the 300 topo I-reactive B cells and topo I-non-reactive B cells from 111 anti-topo I antibody-positive SSc patients were used. **(D)** Affinity for topo I, cytokines, and intracellular proteins was analyzed at the single-cell level using topo I-reactive B cells, 100 each, obtained from anti-topo I antibody-positive SSc patients, and correlation heatmap is shown.  $\mu$ ELISA was used to measure the cytokines, affinity, intracellular kinase, and phosphorylated kinase in each single cell. The color of the heatmap indicates the degree of correlations, which are higher as the color of the heatmap changes from blue to red. The bar graphs show the mean + SD. \*\*\* $p < 0.005$ .

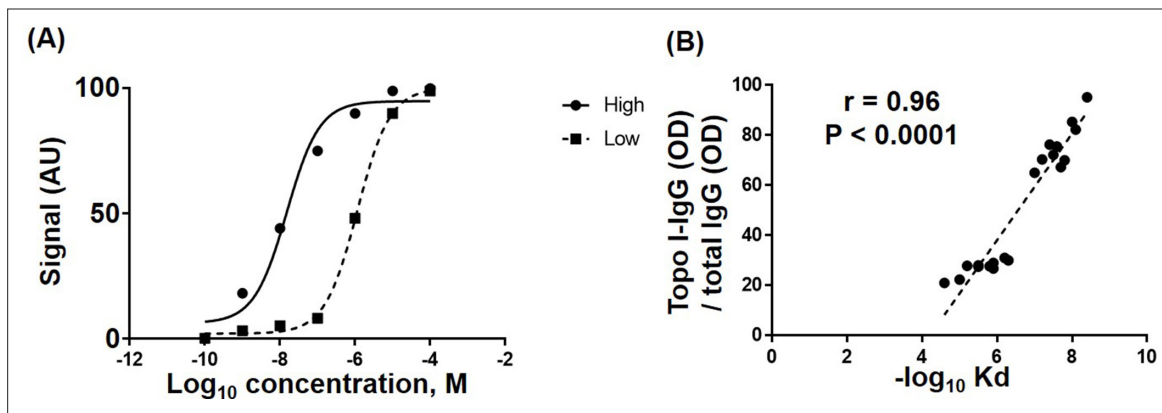

**Figure 2—figure supplement 1.** Affinity analysis and correlation of affinities for topo I in topo I-reactive B cells with topo I-IgG(OD)/total IgG(OD). Topo I-non-reactive B cells and topo I-reactive B cells in CD19<sup>+</sup>CD27<sup>+</sup> B cells were isolated from the peripheral blood of anti-topo I antibody-positive systemic sclerosis (SSc) patients, and topo I titers were measured at the single B cell level. Topo I-reactive B cells were divided into two groups: B cells with low or high affinity for topo I. Each affinity was analyzed and Kd value was calculated (n = 10, respectively) (A). Correlation of -log<sub>10</sub> Kd and topo I-IgG(OD)/total IgG(OD) (B).

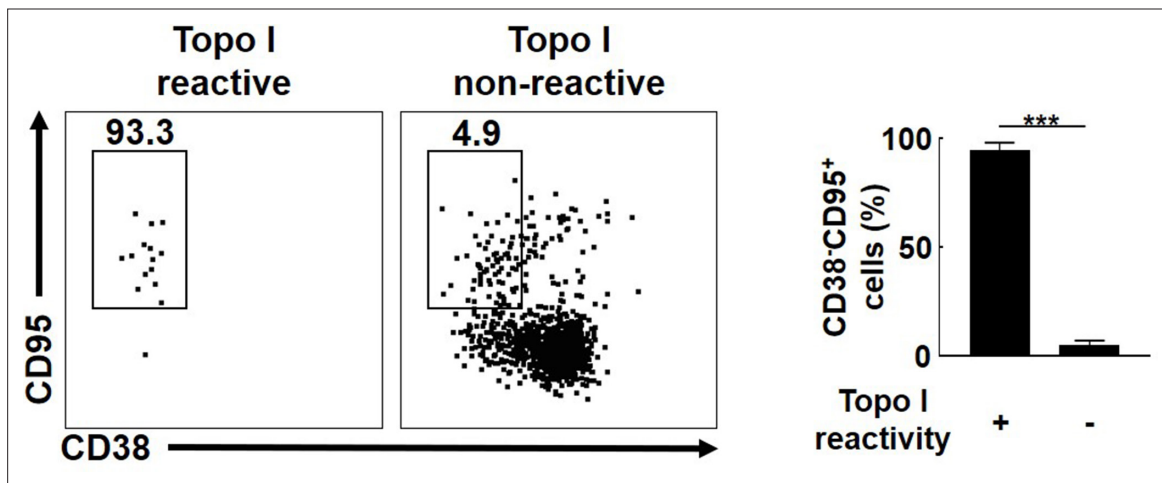

**Figure 2—figure supplement 2.** Frequencies of CD38<sup>+</sup>CD95<sup>+</sup> cells in topo I-PE<sup>+</sup>Topo I-APC<sup>+</sup>CD19<sup>+</sup>CD27<sup>+</sup> B cells in anti-topo I antibody-positive systemic sclerosis (SSc) patients. Frequencies of CD38<sup>+</sup>CD95<sup>+</sup> cells in topo I-PE<sup>+</sup>Topo I-APC<sup>+</sup>CD19<sup>+</sup>CD27<sup>+</sup> B cells in anti-topo I antibody-positive SSc patients were analyzed by flow cytometry (n = 10). The bar graphs show the mean + SD. \*\*\*p<0.005.

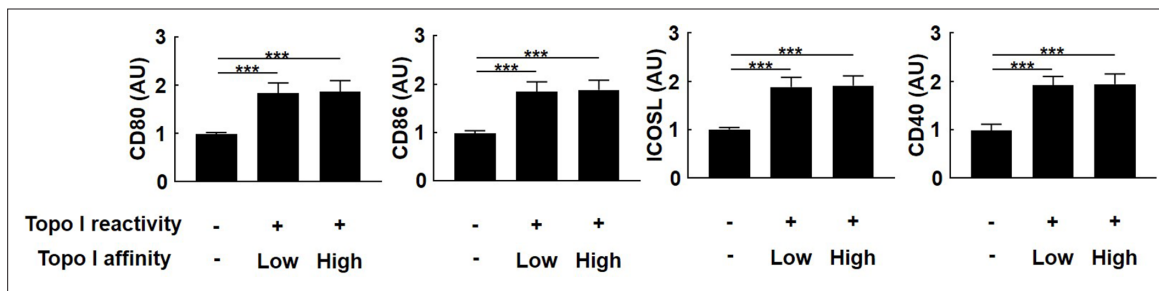

**Figure 2—figure supplement 3.** Expression of co-stimulatory molecules in topo I-PE<sup>+</sup>Topo I-APC<sup>+</sup>CD19<sup>+</sup>CD27<sup>+</sup> B cells in anti-topo I antibody-positive systemic sclerosis (SSc) patients. Expression of co-stimulatory molecules (CD80/86, ICOSL, and CD40) in topo I-non-reactive B cells and topo I-reactive B cells (topo I-PE<sup>+</sup>Topo I-APC<sup>+</sup>CD19<sup>+</sup>CD27<sup>+</sup>) with low or high affinity for topo I in anti-topo I antibody-positive SSc patients was analyzed by  $\mu$ ELISA method (n = 10, respectively). The bar graphs show the mean + SD. \*\*\*p<0.005.

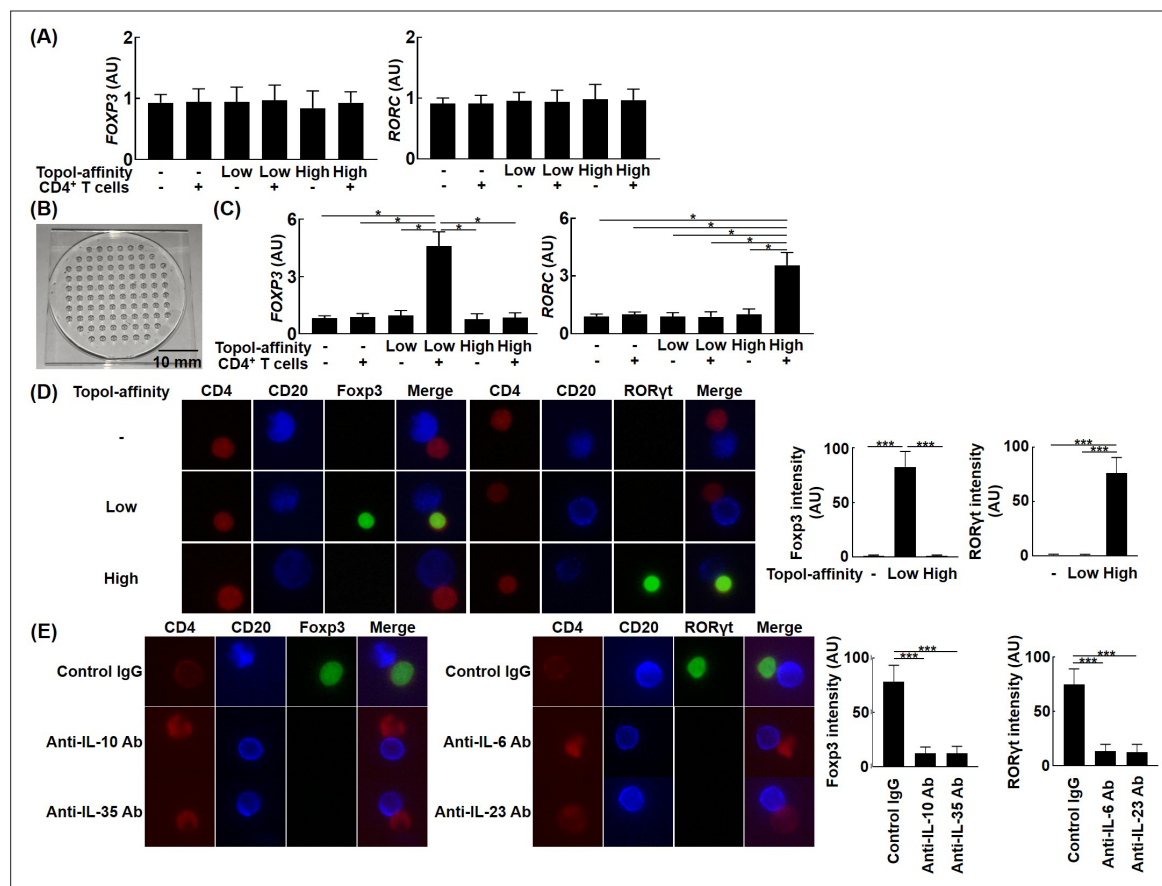

**Figure 3.** Effects of topo I-reactive B cells on the differentiation of CD4<sup>+</sup> T cells in systemic sclerosis (SSc) patients. B cells with low affinity for topo I and those with high affinity for topo I as well as topo I-non-reactive B cells were obtained from anti-topo I antibody-positive SSc patients (n = 111). These B cells were co-cultured with CD4<sup>+</sup> T cells. After 48 hr of co-culture, mRNA was extracted from these cells and FoxP3 and ROR  $\gamma$  t expression levels were examined by real-time RT-PCR. The results were presented when 96-well plates were used as a co-culture site (A) and when microculture plates (B) were used (C). These cells were further co-cultured on microculture plates, and the protein expression of CD4, CD20, FoxP3, and ROR  $\gamma$  t was confirmed by fluorescent cell staining and signal intensity was determined by ImageJ (D). Similarly, co-culture in microculture plates in the presence of anti-IL-10 (10 µg/ml), anti-IL-35 (5 µg/ml), anti-IL-6 (1 µg/ml), or anti-IL-23 (5 µg/ml) antibodies (Abs) was conducted, followed by fluorescent cell staining (E). These results represented seven experiments. The bar graphs show the mean + SD. Original magnification,  $\times 1000$ . \*p < 0.05.

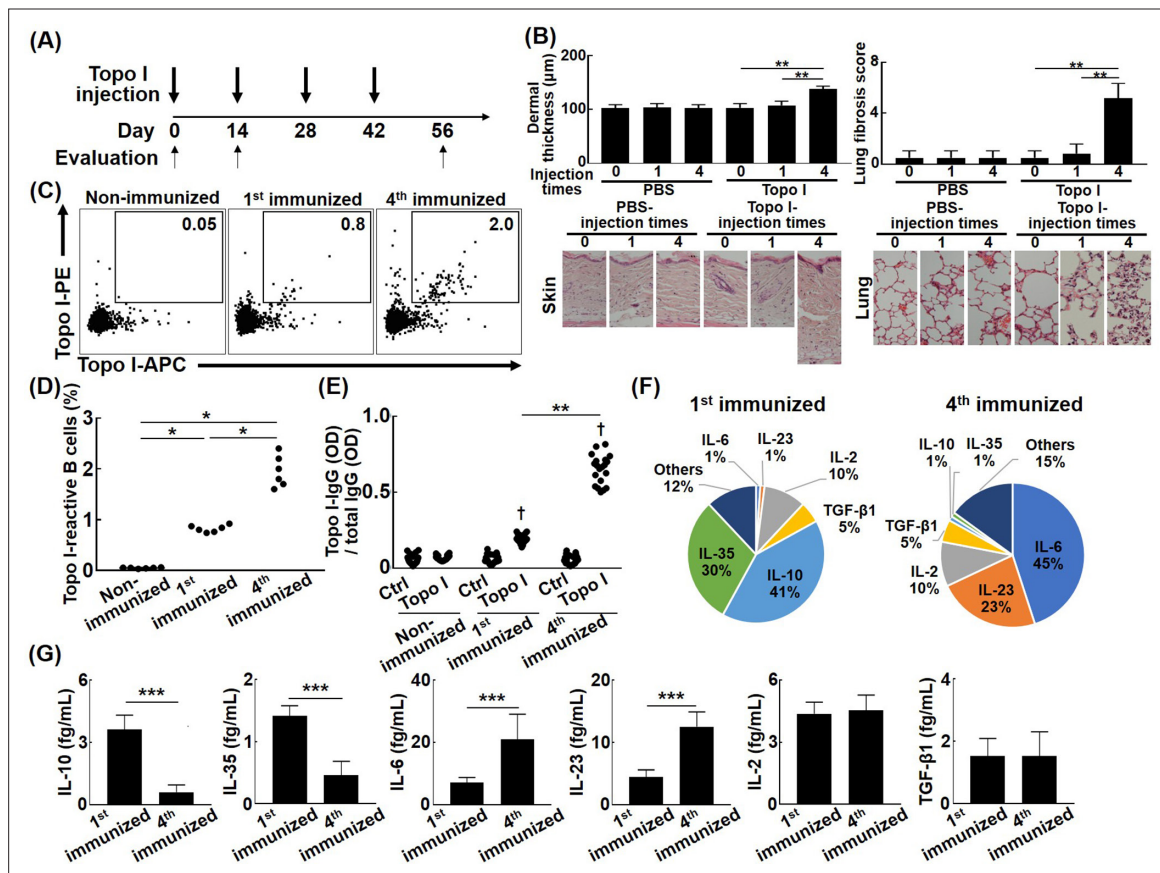

**Figure 4.** The development of fibrosis and cytokine production by topo I-reactive B cells in the topo I-induced systemic sclerosis (SSc) model mice. (A) Topo I-induced SSc model mice were generated by immunizing topo I up to four times every 2 weeks. At days 0, 14, and 56, mice were sacrificed and used for study as non-immunized, first immunized, and fourth immunized mice, respectively. Mice treated with phosphate-buffered saline (PBS) instead of topo I were used as controls. Six mice in each group were used. (B) Dermal thickness and lung fibrosis score, which reflect the extent of skin and lung fibrosis, respectively, were examined histologically using skin (original magnification,  $\times 40$ ) and lung tissues ( $\times 100$ ). (C) Topo I-reactive B cells in splenic B cells from these mice were identified with flow cytometric analysis. Frequencies of topo I-reactive B cells in total B cells (D) and the IgG anti-topo I antibody titer in each of the topo I-reactive B cells (topo I) and topo I-non-reactive B cells (Ctrl) are shown (E). Each of the 100 topo I-reactive B cells isolated from mice immunized once and four times with topo I was analyzed. Frequencies of B cells producing cytokines (F) and the amount of produced cytokines are shown in the pie charts (G). The bar graphs show the mean + SD. \* $p < 0.05$ , \*\* $p < 0.01$ , \*\*\* $p < 0.005$ . † $p < 0.001$  vs. each Ctrl.

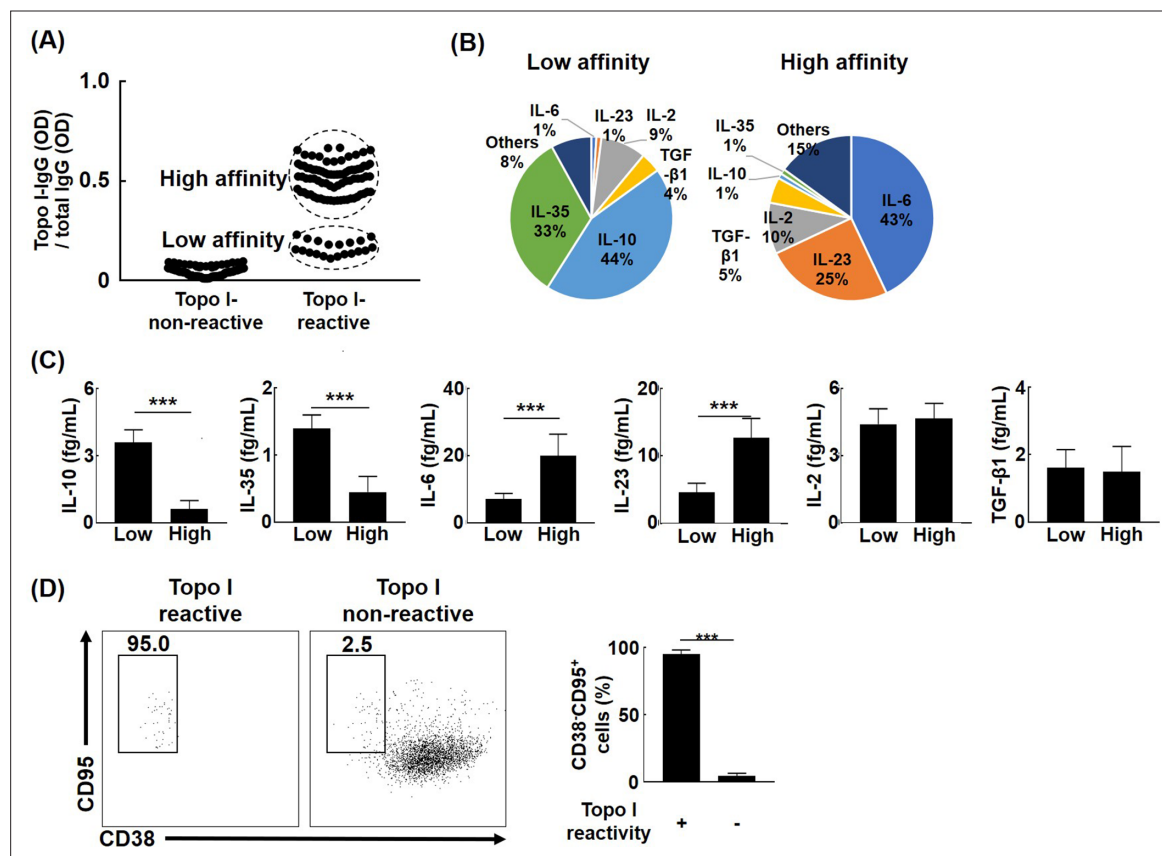

**Figure 4—figure supplement 1.** The relationship between the affinity for topo I in topo I-reactive B cells and their ability to produce cytokines in complete systemic sclerosis (SSc) model mice. Topo I-induced complete SSc model (complete model) mice were generated by immunizing topo I for four times every 2 weeks. At day 56, mice were sacrificed and used for study as complete model mice. Six mice in each group were used. Topo I titers were measured at the single B cell level. Topo I-reactive B cells were also divided into two groups: B cells with low or high affinity for topo I (**A**). The frequency of B cells producing each cytokine is represented in the pie charts (**B**). The amount of each cytokine produced by these cytokine-producing B cells was measured. For these experiments, each of the 300 topo I-reactive B cells and topo I-non-reactive B cells from six complete model mice were used (**C**). Frequencies of CD38<sup>+</sup>CD95<sup>+</sup> cells in topo I-PE<sup>+</sup>Topo I-APC<sup>+</sup>CD19<sup>+</sup> B cells (n = 10) (**D**). The bar graphs show the mean + SD. \*\*\*p<0.005.



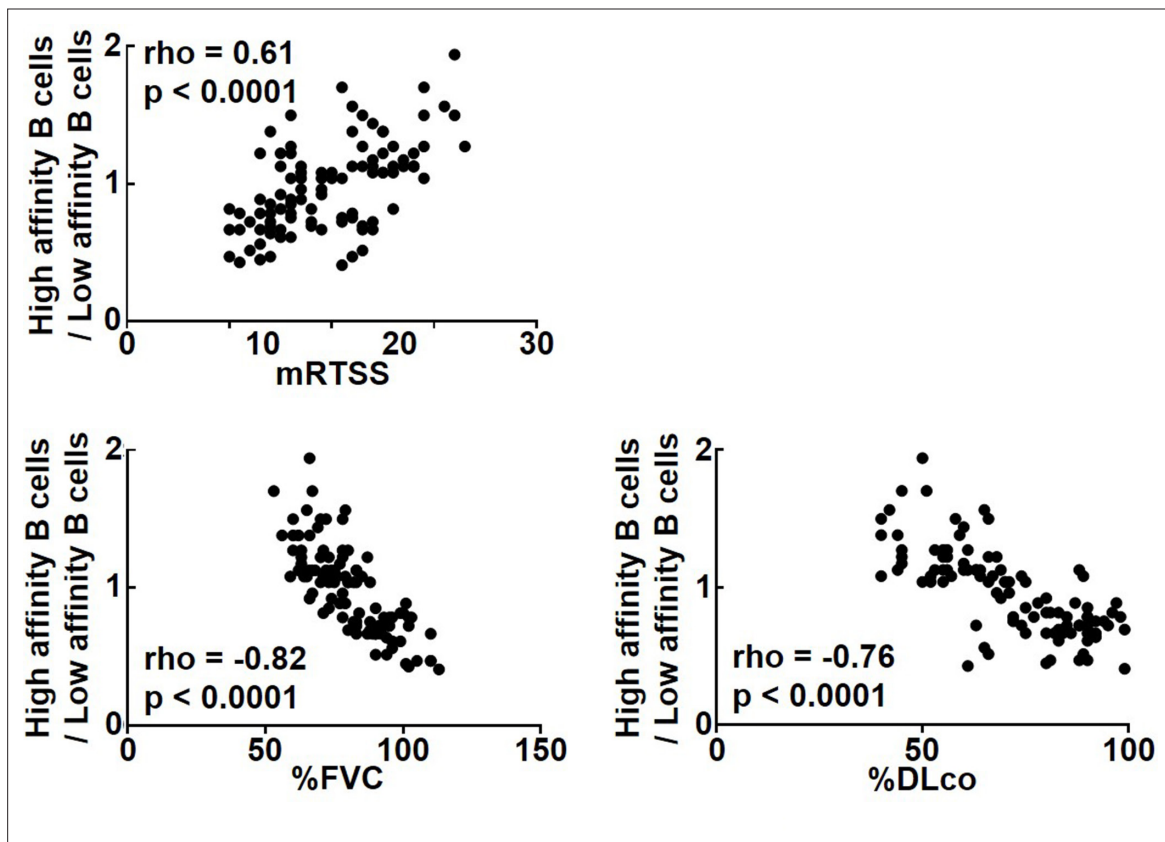

**Figure 5.** Correlation of affinities for topo I in topo I-reactive B cell with clinical parameters for skin and lung fibrosis in systemic sclerosis (SSc) patients. In anti-topo I antibody-positive SSc patients ( $n = 111$ ), the ratio of B cells with high affinity for topo I (high-affinity B cells) to B cells with low affinity for topo I (low-affinity B cells) was correlated with modified Rodnan total skin thickness score (mRTSS), percent predicted values of forced vital capacity (%FVC), and percent predicted values of diffusion capacity of the lung for carbon monoxide (%DLco).

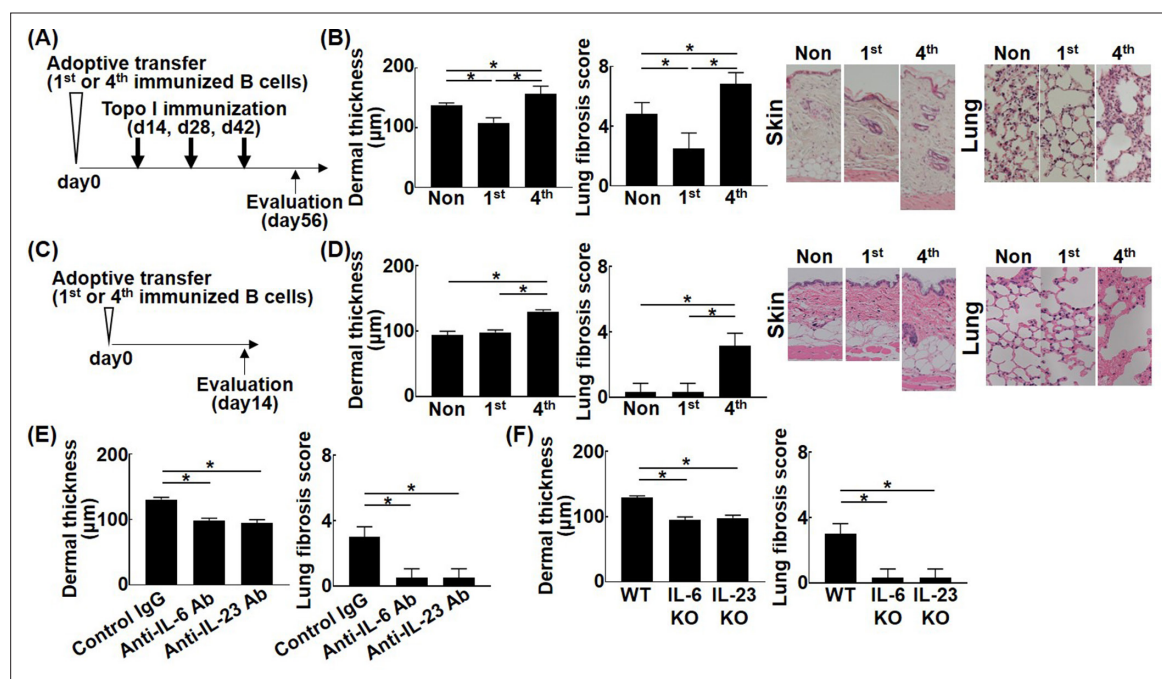

**Figure 6.** Effect of the affinity for topo I in topo I-reactive B cells on the development of fibrosis in the topo I-induced systemic sclerosis (SSc) model mice. Topo I-reactive B cells ( $10^4$  cells) from mice immunized once or four times with topo I were adoptively transferred into wild-type (WT) mice, and 14 days later, these WT mice were immunized with topo I three times every 2 weeks (A). 56 days after the adoptive transfer, the skin (original magnification,  $\times 40$ ) and lung tissues ( $\times 100$ ) were obtained, and the dermal thickness and lung fibrosis score were examined histologically (B). Similarly, after 14 days of the adoptive transfer of topo I-reactive B cells ( $10^4$  cells) from mice immunized once or four times with topo I into non-immunized WT mice (C), the dermal thickness and lung fibrosis score were measured (D). Serum anti-topo I antibody levels were elevated in both first and fourth models compared with non-immunized WT mice. Furthermore, topo I-reactive B cells were adoptively transferred with either anti-IL-6 (1 mg/week, administrated subcutaneously) or anti-IL-23 (100  $\mu$ g/week, administrated subcutaneously) antibodies (Abs), and dermal thickness and lung fibrosis score were examined 14 days after the adoptive transfer (E). WT mice, IL-6-deficient (IL-6KO), and IL-23-deficient (IL-23KO) mice were immunized four times with topo I. Then,  $10^4$  cells of topo I-reactive B cells obtained were transferred to non-immunized WT mice, and the dermal thickness and lung fibrosis score were measured 14 days later. Serum anti-topo I antibody levels were elevated in both IL-6 KO mice and IL-23 KO mice compared with non-immunized WT mice (F). These results represented six experiments. The bar graphs show the mean + SD. \* $p < 0.05$ .

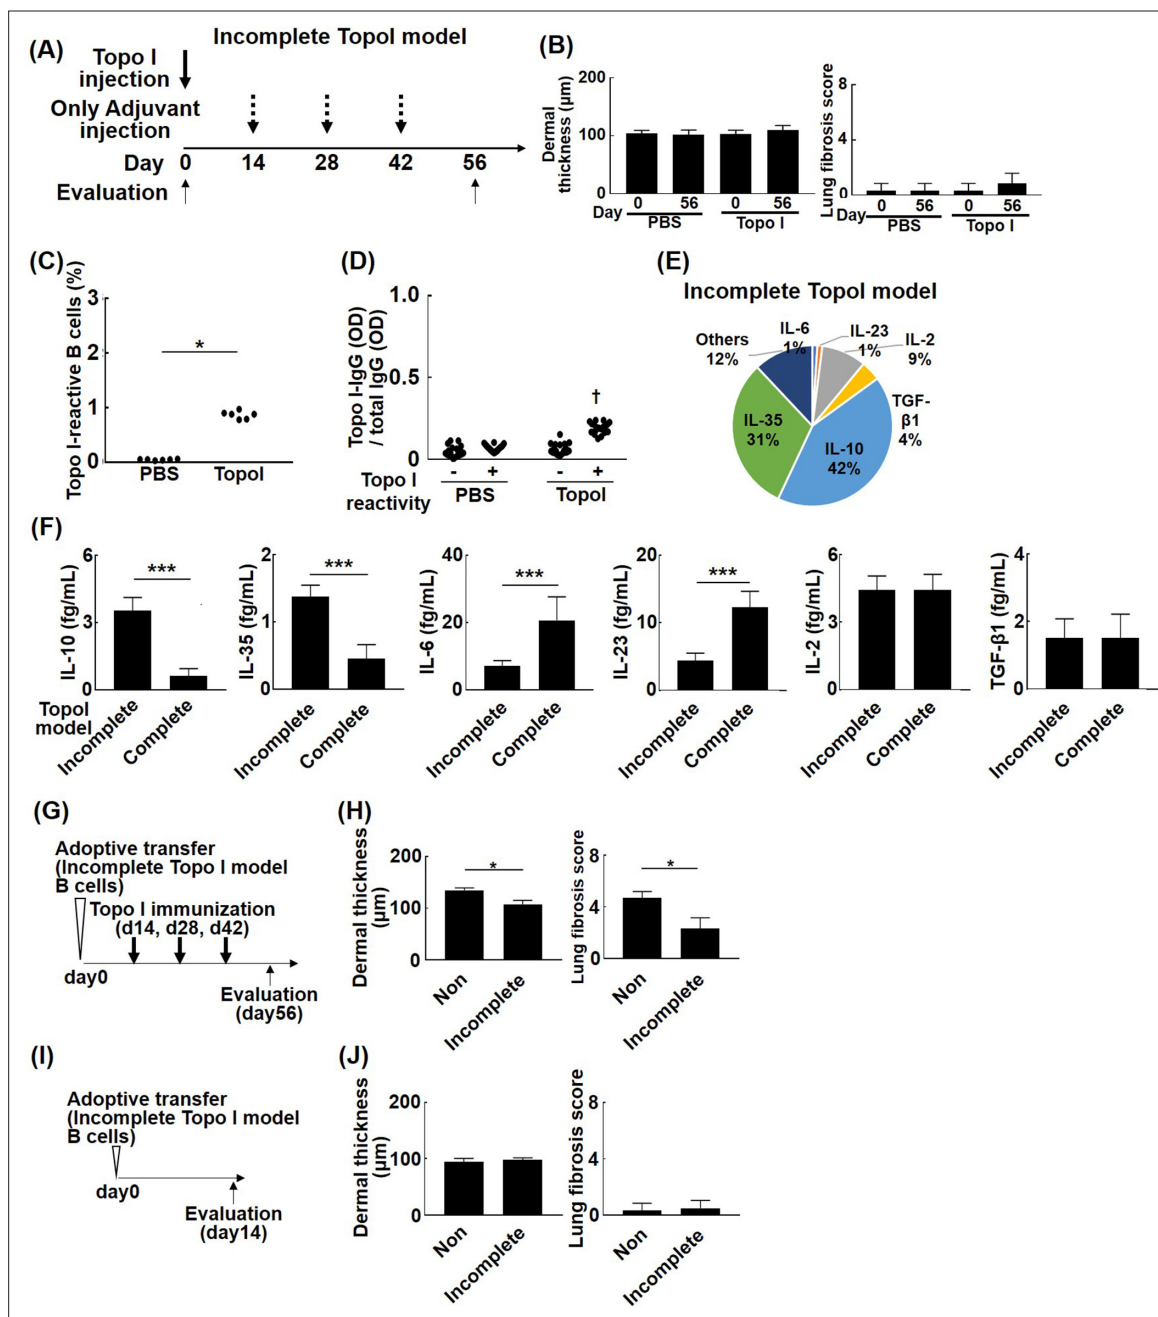

**Figure 6—figure supplement 1.** The effect of fibrosis and cytokine production by topo I-reactive B cells in the topo I-induced incomplete systemic sclerosis (SSc) model mice. Topo I-induced incomplete SSc model (Incomplete model) mice were generated by immunizing topo I for one time, followed by adjuvant immunization up to three times every 2 weeks (A). At days 0 and 56, mice were sacrificed and used for study as non-immunized and fourth immunized mice, respectively. Mice treated with phosphate-buffered saline (PBS) instead of topo I were used as controls. Six mice in each group were used. (B) Dermal thickness and lung fibrosis score, which reflect the extent of skin and lung fibrosis, respectively, were examined histologically using skin (original magnification,  $\times 40$ ) and lung tissues ( $\times 100$ ). (C) Topo I-reactive B cells in splenic B cells from these mice were identified with flow cytometric analysis. Frequencies of topo I-reactive B cells in total B cells (C) and the IgG anti-topo I antibody titer in each of the topo I-reactive B cells (Topo I reactivity+) and topo I-non-reactive B cells (Topo I reactivity-) are shown (D). Each of the 100 topo I-reactive B cells isolated from mice immunized once and four times with topo I was analyzed. Frequencies of B cells producing cytokines and the amount of produced cytokines are shown (E, F). Topo I-reactive B cells ( $10^4$  cells) from incomplete model mice with topo I were adoptively transferred into wild-type (WT) mice, and 14 days later, these WT mice were immunized with topo I three times every 2 weeks (G). 56 days after the adoptive transfer, the skin and lung tissues were obtained, and the dermal thickness and lung fibrosis score were examined histologically (H). Similarly, after 14 days of the adoptive transfer of topo I-reactive B cells ( $10^4$  cells) from incomplete model mice with topo I into non-immunized WT mice (I), the dermal thickness and lung fibrosis score were measured (J). The bar graphs show the mean  $\pm$  SD. \* $p < 0.05$ , \*\* $p < 0.01$ , \*\*\* $p < 0.005$ . † $p < 0.001$  vs. each control.

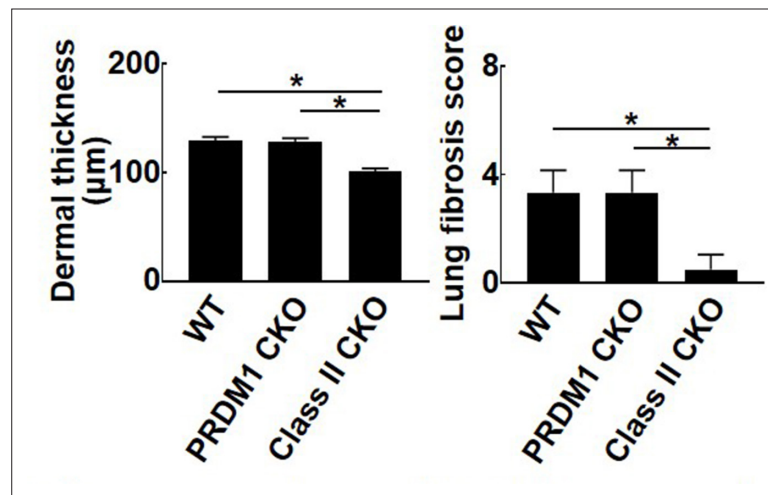

**Figure 6—figure supplement 2.** Effect of B cell-specific Blimp1 or class II in topo I-reactive B cells on the development of fibrosis in the topo I-induced systemic sclerosis (SSc) model mice. Wild-type (WT) mice, B cell-specific Blimp1 CKO mice (PRDM1 CKO), and B cell-specific class II CKO mice (Class II CKO) were immunized four times with topo I. Then,  $10^4$  cells of topo I-reactive B cells obtained were transferred to non-immunized WT mice, and the dermal thickness and lung fibrosis score were measured 14 days later. These results represented six experiments. The bar graphs show the mean + SD. \* $p < 0.05$ .

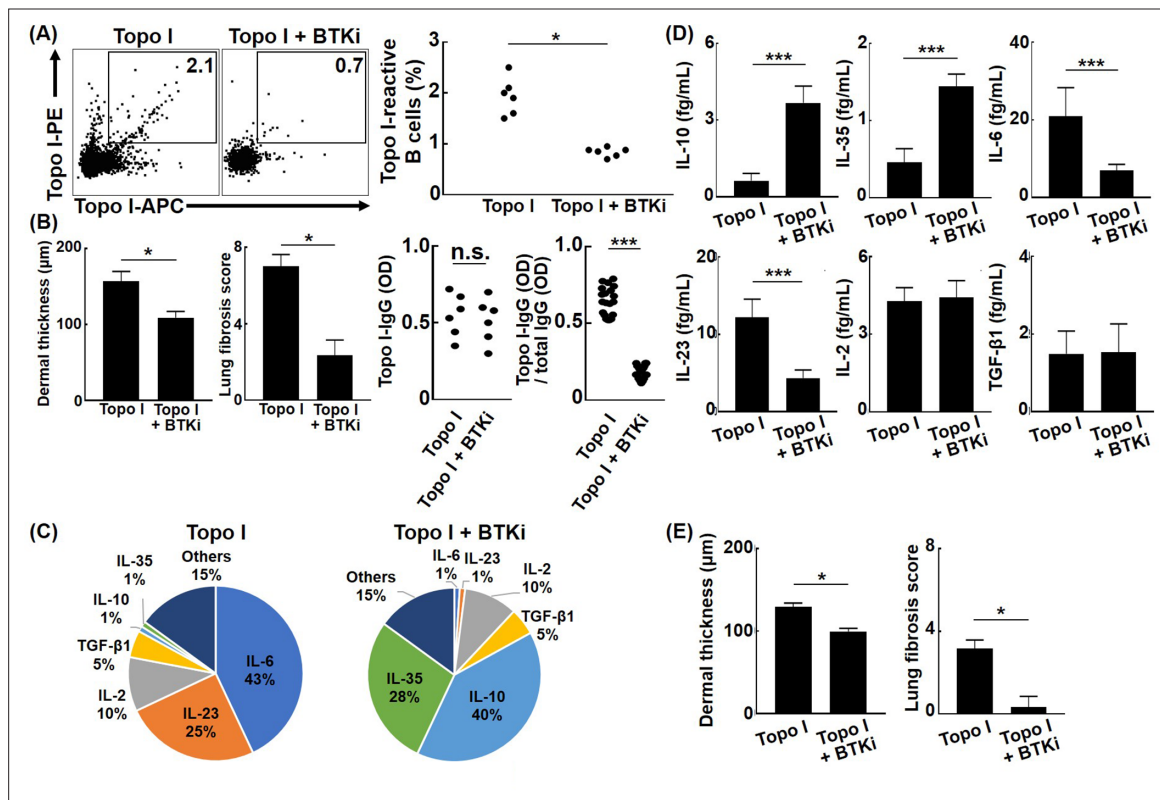

**Figure 7.** Effect of Bruton's tyrosine kinase (BTK) inhibition on the affinity for topo I of topo I-reactive B cells and the development of fibrosis in the topo I-induced systemic sclerosis (SSc) model mice. **(A)** Frequencies of topo I-reactive B cells in splenic B cells from mice immunized four times with topo I and from mice treated with a BTK inhibitor along with topo I were examined. Ibrutinib (12.5 mg/kg/day, administrated orally) was used as the BTK inhibitor. **(B)** We measured the dermal thickness, lung fibrosis score, titer of serum IgG anti-topo I antibodies, and titer of IgG anti-topo I antibodies produced by individual topo I-reactive B cells in these mice ( $n = 6$ ). Frequencies of cytokine-producing topo I-reactive B cells (**C**, total 200 cells) and the amount of produced cytokine (**D**, 100 cells each) are shown in the pie charts. **(E)** Topo I-reactive B cells ( $10^4$  cells) obtained from these mice ( $n = 6$ ) were adoptively transferred to wild-type mice, and the dermal thickness and lung fibrosis score were measured after 14 days. Topo I, topo I-induced SSc model mice; Topo I + BTKi; BTK inhibitor-treated topo I-induced SSc model mice. The bar graphs show the mean + SD. \* $p < 0.05$ , \*\*\* $p < 0.005$ .

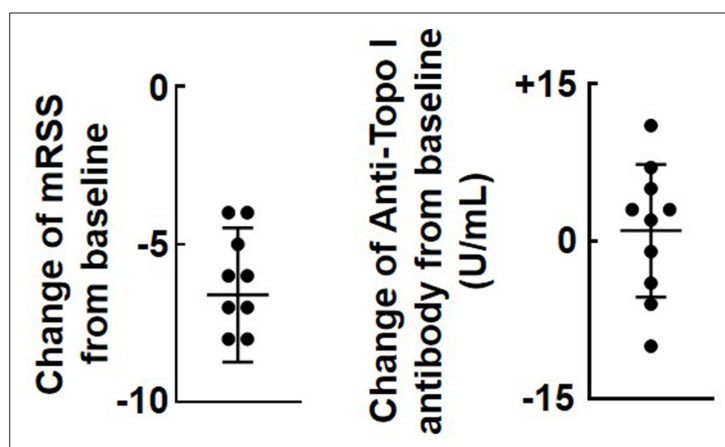

**Figure 7—figure supplement 1.** Change of modified Rodnan skin score (mRSS) and anti-topo I antibody from baseline after rituximab (RTX) treatment. For the 10 patients who received RTX treatment, data at 1 year after RTX showed that mRSS improved by an average of about six points, while titer remained the same.
